# Supplementary material for: Can we validate a clinical score to predict the risk of severe infection in patients with systemic lupus erythematosus? A longitudinal retrospective study in a British Cohort
Source: PubMed Central journal article supplement — BMJ Open. 2019 Jun 14;9(6):e028697. doi: 10.1136/bmjopen-2018-028697 (PMC6589043; doi:10.1136/bmjopen-2018-028697), 2019-06-14
Supplement: bmjopen-2018-028697.draft_revisions.pdf [file bmjopen-2018-028697.draft_revisions.pdf]

# BMJ Open

BMJ Open is committed to open peer review. As part of this commitment we make the peer review history of every article we publish publicly available.

When an article is published we post the peer reviewers' comments and the authors' responses online. We also post the versions of the paper that were used during peer review. These are the versions that the peer review comments apply to.

The versions of the paper that follow are the versions that were submitted during the peer review process. They are not the versions of record or the final published versions. They should not be cited or distributed as the published version of this manuscript.

BMJ Open is an open access journal and the full, final, typeset and author-corrected version of record of the manuscript is available on our site with no access controls, subscription charges or pay-per-view fees (<http://bmjopen.bmj.com>).

If you have any questions on BMJ Open's open peer review process please email [info.bmjopen@bmj.com](mailto:info.bmjopen@bmj.com)

# BMJ Open

## Development and validation of a score to predict the risk of severe infection in Systemic Lupus Erythematosus

|                               |                                                                                                                                                                                                                                                                                                                                                                                                                                                                                                                                                                                                                                                                                                                                                                                                                                                                                                                                       |
|-------------------------------|---------------------------------------------------------------------------------------------------------------------------------------------------------------------------------------------------------------------------------------------------------------------------------------------------------------------------------------------------------------------------------------------------------------------------------------------------------------------------------------------------------------------------------------------------------------------------------------------------------------------------------------------------------------------------------------------------------------------------------------------------------------------------------------------------------------------------------------------------------------------------------------------------------------------------------------|
| Journal:                      | <i>BMJ Open</i>                                                                                                                                                                                                                                                                                                                                                                                                                                                                                                                                                                                                                                                                                                                                                                                                                                                                                                                       |
| Manuscript ID                 | bmjopen-2018-028697                                                                                                                                                                                                                                                                                                                                                                                                                                                                                                                                                                                                                                                                                                                                                                                                                                                                                                                   |
| Article Type:                 | Research                                                                                                                                                                                                                                                                                                                                                                                                                                                                                                                                                                                                                                                                                                                                                                                                                                                                                                                              |
| Date Submitted by the Author: | 19-Dec-2018                                                                                                                                                                                                                                                                                                                                                                                                                                                                                                                                                                                                                                                                                                                                                                                                                                                                                                                           |
| Complete List of Authors:     | <p>Tejera Segura, Beatriz; University College London, Centre for Rheumatology Research<br/> Rua-Figueroa, Iñigo; Doctor Negrín University Hospital of Gran Canaria, Rheumatology Department, ; RELESSER Group (Spanish Rheumatology Society Lupus Registry)<br/> Pego-Reigosa, Jose Maria; Rheumatology Department, University Hospital Vigo, IRIDIS Group, Instituto de Investigación Sanitaria Galicia Sur (IISGS) , Rheumatology Department; Group (Spanish Rheumatology Society Lupus Registry)<br/> del Campo, Victor; University Hospital Vigo, IRIDIS Group , Instituto de Investigación Sanitaria Galicia Sur (IISGS), Preventive Medicine and Epidemiology Department<br/> Wincup, Chris; University College London, Centre for Rheumatology Research<br/> Isenberg, David; University College London, Centre for Rheumatology Research<br/> Rahman, Anisur; University College London, Centre for Rheumatology Research</p> |
| Keywords:                     | Systemic lupus erythematosus, severe infection, risk score                                                                                                                                                                                                                                                                                                                                                                                                                                                                                                                                                                                                                                                                                                                                                                                                                                                                            |
|                               |                                                                                                                                                                                                                                                                                                                                                                                                                                                                                                                                                                                                                                                                                                                                                                                                                                                                                                                                       |

SCHOLARONE™  
Manuscripts

1  
2  
3 **Development and validation of a score to predict the risk of severe infection in**  
4  
5 **Systemic Lupus Erythematosus**  
6  
7

8 Beatriz Tejera Segura MD<sup>1</sup>, Iñigo Rua-Figueroa MD<sup>2-5</sup>, José María Pego-Reigosa  
9 MD<sup>3-5</sup>, Victor del Campo MD<sup>4</sup>, Chris Wincup MD<sup>1</sup>, David Isenberg MD FRCP<sup>1</sup> and  
10  
11  
12  
13 Anisur Rahman PhD FRCP<sup>1</sup>  
14

15  
16 <sup>1</sup>Centre for Rheumatology Research, University College London, London, UK  
17

18  
19 <sup>2</sup> Rheumatology Department, Doctor Negrín University Hospital of Gran Canaria,  
20  
21 Spain.  
22

23  
24 <sup>3</sup>Rheumatology Department, University Hospital Vigo, IRIDIS Group, Instituto de  
25  
26 Investigación Sanitaria Galicia Sur (IISGS) , Vigo, Spain.  
27

28  
29 <sup>4</sup>Preventive Medicine and Epidemiology Department, University Hospital Vigo, IRIDIS  
30  
31 Group , Instituto de Investigación Sanitaria Galicia Sur (IISGS), Vigo, Spain.  
32  
33

34  
35 <sup>5</sup>RELESSER Group (Spanish Rheumatology Society Lupus Registry)  
36  
37

38  
39 **Running Head**  
40

41  
42 A score to predict severe infection in SLE  
43  
44

45 **Corresponding Author**  
46

47  
48 Professor Anisur Rahman  
49

50  
51 Centre for Rheumatology Research, Division of Medicine  
52

53  
54 Fourth Floor Rayne Institute  
55

56  
57 5 University Street  
58  
59  
60

1  
2  
3 London WC1E 6JF  
4  
5

6 United Kingdom  
7  
8

9 Tel +442031082168  
10  
11

12 e-mail anisur.rahman@ucl.ac.uk  
13  
14  
15  
16  
17  
18  
19  
20  
21  
22  
23  
24  
25  
26  
27  
28  
29  
30  
31  
32  
33  
34  
35  
36  
37  
38  
39  
40  
41  
42  
43  
44  
45  
46  
47  
48  
49  
50  
51  
52  
53  
54  
55  
56  
57  
58  
59  
60

For peer review only

## **Abstract**

**Objective.** Severe infections are a major cause of morbidity and mortality in patients with systemic lupus erythematosus (SLE). Our objective was to use data from a large Spanish cohort to develop a risk score for severe infection in SLE, the SLE Severe Infection Score (SLESIS) and to validate SLESIS in a separate cohort of 699 British patients.

**Methods.** From the British cohort, we identified 98 patients with SLE who had suffered severe infections and 111 randomly selected patients with SLE who had never suffered severe infections. We retrospectively calculated SLESIS at diagnosis for all 209 patients at diagnosis. For the infection cases we also calculated SLESIS just prior to infection and compared it to SLESIS in 98 controls matched for disease duration. We carried out receiver operator characteristic (ROC) analysis to quantify predictive value of SLESIS for severe infection.

**Results.** Median SLESIS (IQR) at diagnosis was higher in the infection group than in the control group (4.27 (3.18) vs. 2.55 (3.79),  $p=0.0008$ ). Median SLESIS prior to infection was higher than at diagnosis (6.64 vs. 4.27,  $p<0.001$ ). In ROC analysis, predictive value of SLESIS just before the infection (Area Under Curve=0.79) was higher than that of SLESIS at diagnosis (AUC=0.63).

**Conclusions.** We validated the association of SLESIS with severe infection in an independent cohort. Calculation of SLESIS at each clinic visit may help in management of infection risk in patients with SLE. Prospective studies are needed to confirm these findings.

### **Strengths and limitations**

- 1) Severe infection affected 1 in 7 of this cohort of 699 patients with SLE during the course of their disease. A quarter of these patients died during their admission with severe infection.
- 2) Treatment with high dose corticosteroids, previous infection and hospitalizations due to SLE were the most important risk factors associated with severe infection.
- 3) We developed an algorithm designed to predict the risk of severe infections in SLE patients which could be a useful tool in clinical practice.
- 4) We acknowledge several limitations: the retrospective design of the study, the different ethnicity in the Spanish and British population and the Katz Index as an item of the score.

### **Key Words**

Systemic lupus erythematosus, severe infection, risk score.

## Introduction

Systemic lupus erythematosus (SLE) is a systemic autoimmune disease that mainly presents in women aged between 30 and 50 years. Infection is a major cause of morbidity and mortality in patients with SLE, being responsible for 11-45% of hospitalizations as well as 20-55% of deaths, according to different studies<sup>1-6</sup>.

There are immunological and genetic disorders that predispose to the development of infections in patients with SLE<sup>7,8</sup>. Respiratory tract infections are the most common infections in these patients, and bacteremia the leading cause of mortality<sup>17,28</sup>. Regarding the etiology, pathogenic bacteria are most frequently involved in the infection, followed by viruses and fungi<sup>9,10</sup>.

There are several well-established risk factors for infection such as age at diagnosis, male sex, ethnicity and use of corticosteroids, among others; however, the independent contribution of each factor is not well understood<sup>11-14</sup>. On the other hand, severe infections have been associated with decreased survival of patients with SLE, acting as an independent risk factor for mortality at 10 years after diagnosis<sup>2-4, 14</sup>.

This information about the risk factors associated with infection in SLE has not yet been combined into tools to estimate the risk of severe infection in individual patients over time. The development of an algorithm for predicting the risk of severe infection could be very useful to monitor risk factors more closely in a weighted way. It could allow us to implement prophylactic measures such as vaccination in the highest risk

1  
2  
3 patients and to consider early intervention such as antibiotic therapy in this group of  
4  
5 patients with the ultimate goal of reducing morbidity and improving survival<sup>15-17</sup>. Similar  
6  
7 scores to predict risk of severe infection have been developed and validated in patients  
8  
9 with rheumatoid arthritis (RA) with encouraging results<sup>18</sup>.

10  
11  
12  
13  
14  
15  
16 In a recent original study from Spanish Society of Rheumatology Lupus Registry  
17  
18 (RELESSER), the authors studied 3,658 patients with SLE, of whom 705 (19.3%) had  
19  
20 suffered one or more severe infections. A multivariable Cox regression model for  
21  
22 repeated events (Andersen Gill) was used to define the impact of a range of  
23  
24 demographic and clinical variables on the risk of developing severe infection,  
25  
26 expressed as Hazard Ratio (HR) of developing severe infection for patients with each  
27  
28 associated factor, compared to those without that factor<sup>17</sup>. Seven factors had HR more  
29  
30 than 1.  
31  
32  
33  
34  
35  
36  
37  
38

39 In the study reported in the current paper these seven factors were used to generate  
40  
41 a score – the Systemic Lupus Erythematosus Severe Infection Score (SLESIS),  
42  
43 designed to predict the risk that a patient with lupus will develop a severe infection.  
44  
45 We then validated SLESIS in an independent population of patients with SLE from  
46  
47 London, UK.  
48  
49  
50  
51  
52  
53

54 In the validation cohort, we aimed to answer three questions  
55  
56

57 1) Does the SLESIS at the time of diagnosis predict future severe infection?  
58  
59  
60



1  
2  
3 2) In patients who suffer a severe infection, does the SLESIS change between  
4  
5 diagnosis and the time of infection?  
6  
7

8 3) Does the SLESIS just prior to an infection predict future severe infection?  
9  
10

11 If 2) and 3) are true, it could support assessing SLESIS at every appointment rather  
12  
13 than only at diagnosis.  
14  
15  
16  
17  
18  
19  
20  
21

## 22 **Patients and Methods**

### 23 24 25 26 27 ***Development and definition of SLESIS***

28  
29  
30  
31  
32  
33 The SLESIS score was developed using data from the RELESSER (Spanish Society  
34  
35 of Rheumatology Lupus Registry) cohort of 3,658 SLE patients who meet  $\geq 4$   
36  
37  
38

39 ACR classification criteria for SLE. The variables, definitions and methodological  
40  
41 characteristics of the RELESSER registry have previously been described in detail<sup>19</sup>  
42  
43

44 20.  
45  
46  
47  
48  
49

50 In the RELESSER infection study, the following factors were found to be associated  
51  
52 with increased risk of developing severe infection (defined as infection leading to  
53  
54 hospitalization and/or death)<sup>17</sup>: age at diagnosis  $> 46$  years (HR = 1.12); Latin  
55  
56 American ethnicity (HR = 2.4); dose of corticosteroid  $\geq 10$  mg/day (HR = 1.33); male  
57  
58 sex (HR = 1.49); previous hospitalizations for SLE (HR = 2.73); Katz Index<sup>21</sup> of disease  
59  
60

1  
2  
3 severity (HR = 1.40) and previous severe infection (HR =  $n \times 2.40$  where  $n$  is the  
4 number of severe infections) (Table 1).  
5  
6  
7  
8  
9

10  
11 To calculate SLESIS for an individual patient at any time point the HR values for all  
12 the applicable risk factors are added together.  
13  
14  
15

### 16 17 18 19 20 **Validation cohort** 21

22  
23  
24  
25  
26 Validation was carried out in the lupus clinic at University College London Hospital  
27 (UCLH). All patients fulfilled the 1997 revised criteria of the American College of  
28 Rheumatology (ACR) for the classification of SLE<sup>22</sup>. The clinic has been running  
29 continuously since 1979 and has records from 699 patients. Medical records of all the  
30 patients were reviewed to identify those who had suffered severe infections. Severe  
31 infection was defined as that leading to hospitalization and/or death. Isolation of the  
32 causative agent was not required in every case, with final classification as an infection  
33 being made using standard clinical criteria as in the previous RELESSER study<sup>17</sup>. Only  
34 infections recorded during the follow-up period (i.e after the diagnosis of lupus) were  
35 included as outcomes.  
36  
37  
38  
39  
40  
41  
42  
43  
44  
45  
46  
47  
48  
49  
50  
51  
52

53 We identified 98 patients who had suffered at least one severe infection and compared  
54 their medical records with those of 111 randomly selected patients with SLE who had  
55 never suffered from severe infections. By retrospective analysis of medical records,  
56  
57  
58  
59  
60

1  
2  
3 we obtained comprehensive information about demographic, clinical, serological and  
4  
5 treatment factors in these two groups.  
6  
7  
8  
9

10  
11 We calculated the SLESIS for each of the 209 patients with infection at the time of  
12  
13 diagnosis. For each of the 98 patients with infection we also calculated SLESIS for the  
14  
15 clinical assessment carried out at the last consultation prior to the infection. For  
16  
17 comparison, we calculated SLESIS in 98 controls matched for disease duration, as  
18  
19 follows. For each infection case we selected one control case from the 111 who had  
20  
21 never suffered severe infections. For the control we calculated the SLESIS at the time-  
22  
23 point after diagnosis corresponding to the duration after diagnosis when the matched  
24  
25 case suffered severe infection.  
26  
27  
28  
29  
30  
31  
32  
33

### 34 ***Statistical analysis***

35  
36  
37  
38  
39

40 Demographic and clinical characteristics were compared between patients who  
41  
42 developed severe infection and patients who did not, using a Pearson  $\chi^2$  for  
43  
44 categorical variables or a Student's t-test for normally distributed continuous variables  
45  
46 (data expressed as mean  $\pm$  standard deviation). For non-normally distributed  
47  
48 variables, either a Mann-Whitney U test or a logarithmic transformation was  
49  
50 performed, and data are expressed as median and interquartile range. Multivariable  
51  
52 logistic regression analysis was performed to establish which factors were  
53  
54 independently associated with severe infection.  
55  
56  
57  
58  
59  
60

1  
2  
3 We compared SLESIS scores between case and control groups using the Mann-  
4 Whitney U test. Receiver Operator Characteristics (ROC) analysis was used to define  
5 the area under the curve (AUC) for SLESIS at diagnosis and SLESIS just prior to  
6 infection. We also identified several possible cut-off scores for SLESIS with different  
7 combinations of specificity and sensitivity for severe infection.  
8  
9  
10  
11  
12  
13  
14  
15  
16  
17

18 The STATA for Windows statistical software package (v.13.1) was used for all  
19 statistical analysis. Significance was defined as  $p < 0.05$ .  
20  
21  
22  
23  
24  
25  
26

### 27 ***Patients and/or public involvement***

28  
29  
30  
31  
32

33 Patients and/or public were not involved in this study.  
34  
35  
36  
37  
38  
39  
40  
41  
42  
43  
44  
45  
46  
47  
48  
49  
50  
51  
52  
53  
54  
55  
56  
57  
58  
59  
60

## **Results**

Table 2 shows a comparison of the 98 patients (14% of the total cohort of 699 patients) who developed severe infection and the control group of 111 patients who never suffered from severe infection. These two groups did not differ in age, sex or ethnicity.

Patients who developed severe infections after diagnosis of SLE were more likely to have suffered previous severe infections before diagnosis of SLE (Pearson  $\chi^2 = 11.69$ ,  $p=0.001$ ) or to have been hospitalized for SLE (Pearson  $\chi^2 = 11.89$ ,  $p=0.001$ ) compared to those patients who never had severe infections. In terms of SLE manifestations, skin and renal disease were more common in the infection group (Pearson  $\chi^2 = 6.25$ ,  $p=0.012$ ; Pearson  $\chi^2 = 6.5$ ,  $p=0.01$ ) whereas joint involvement was more frequent in the non-infection group (Pearson  $\chi^2 = 11.21$ ,  $p=0.001$ ).

Patients in the infection group were more likely to have been treated with high doses of corticosteroids or an immunosuppressant (IS). Whereas 55% of the infection group had ever been treated with corticosteroids at a dose  $\geq 10$ mg per day, this only happened in 5.4% of the non-infected group (Pearson  $\chi^2 = 62.81$ ,  $p = <0.001$ ). Significantly increased risk of infection was found for azathioprine (Pearson  $\chi^2 = 5.89$ ,  $P=0.015$ ) and cyclophosphamide (Pearson  $\chi^2 = 8.26$ ,  $p=0.004$ ) but not for mycophenolate or rituximab. Hydroxychloroquine had been taken by 77% of the non-infection group compared to 67% of the infection group with no significant difference between groups.

1  
2  
3  
4  
5  
6 Regarding laboratory data, only neutropenia, which was twice as common in the  
7 infection group (34% vs. 17%), was significantly different between both groups  
8  
9 (Pearson  $\chi^2 = 7.63$ ,  $p = 0.006$ ).  
10  
11  
12  
13  
14  
15  
16

17 After multivariable analysis adjusted for age, only previous infection (beta coefficient:  
18 2.20, 95% CI: 0.77-3.62;  $p = 0.003$ ), previous hospitalizations for SLE (beta coefficient:  
19 1.12, 95% CI: 0.19-2.07;  $p = 0.021$ ) and treatment with corticosteroids  $\geq 10$  mg/day,  
20  
21 (beta coefficient: 3.39, 95% CI: 2.33 – 4.44;  $p < 0.001$ ) remained statistically significant.  
22  
23  
24  
25  
26  
27  
28  
29

### 30 ***Type of infection***

31  
32  
33  
34  
35  
36 The most common type of severe infection was respiratory tract infection (n=29; 29.6%  
37 of all infections), followed by urinary tract infection (n=22, 22.4%) and gastrointestinal  
38 infection (n=22, 22.4%). Less frequent were soft tissue infection (n=11, 11.2%) and  
39 nervous system infections (n=4, 4.1%). Twelve (12.4%) of the patients developed  
40 documented bacteraemia on blood culture and 15 (15.3%) had multiple organ  
41 involvement.  
42  
43  
44  
45  
46  
47  
48  
49  
50  
51  
52  
53

### 54 ***Mortality***

1  
2  
3 About a quarter (26.5%) of the patients died during their admission for severe infection,  
4 though this does not imply that death was always due to infection as many patients  
5 had co-morbidities or active lupus as well. Having recorded this high proportion of  
6 deaths, we analyzed the differences between the group of 26 patients who died during  
7 their admission for infection and the 72 patients who survived. These results are  
8 summarized in Table 3.  
9  
10  
11  
12  
13  
14  
15  
16  
17  
18  
19  
20

21 Patients who did not die had more previous hospitalizations due to SLE, compared to  
22 those who died (Pearson  $\chi^2 = 33.71$ ,  $p < 0.001$ ). In contrast, those who died were more  
23 likely to have suffered from severe infections prior to the diagnosis of SLE (Pearson  
24  $\chi^2 = 8.66$ ,  $p = 0.003$ ).  
25  
26  
27  
28  
29  
30  
31  
32  
33

34 There were no statistically significant differences among the clinical manifestations of  
35 SLE between these two groups.  
36  
37  
38  
39  
40  
41  
42

43 Regarding treatment, there were statistically significant differences for steroids at any  
44 time (Pearson  $\chi^2 = 8.19$ ,  $p = 0.004$ ) and rituximab (Pearson  $\chi^2 = 9.34$ ,  $p = 0.002$ ).  
45 However, for both these variables, patients who survived were more likely to have  
46 taken these drugs than those who died. Importantly, we only considered use of drugs  
47 in the period between diagnosis and first infection so survival from first infection would  
48 not affect the proportion of patients recorded as taking any drug.  
49  
50  
51  
52  
53  
54  
55  
56  
57  
58  
59  
60

1  
2  
3 Multiple organ involvement by infection was more common in deceased patients than  
4  
5 in patients who survived (Pearson  $\chi^2 = 20.5$ ,  $p < 0.001$ ). Patients who died were more  
6  
7 likely to have had positive anti-dsDNA compared to those who survived.  
8  
9

10  
11  
12  
13  
14 After multivariable analysis adjusted for age, previous hospitalizations due to SLE,  
15  
16 previous infection and the presence of multiple organ involvement remained  
17  
18 statistically significant as factors differentiating patients who died from those who  
19  
20 survived (Beta coefficient: -6.15, 95% CI: -9.57- -2.73;  $p < 0.001$ ; beta coefficient: 3.55,  
21  
22 95% CI: 0.47-6.63;  $p = 0.024$  and Beta coefficient 3.51 95% CI: 0.9-6.12;  $p = 0.008$ ).  
23  
24  
25  
26  
27  
28  
29

### 30 ***Analysis of SLESIS values over time***

31  
32  
33  
34  
35

36 Median (IQR) SLESIS at diagnosis of SLE in patients with infection was 4.27 (3.18)  
37  
38 which was significantly higher than in the control (no infection) group (Median 2.55,  
39  
40 IQR 3.79 ( $z = -3.34$ ;  $p = 0.0008$ )). Median (IQR) SLESIS just before the infection in the  
41  
42 infection group was 6.64 (4.18) which was statistically higher than the median SLESIS  
43  
44 at diagnosis in those patients ( $z = -5.73$ ,  $p < 0.001$ ) and also higher than median  
45  
46 SLESIS in the duration-matched control group at a comparable time-point in their  
47  
48 disease course (median 3.32, IQR 3.16,  $z = -6.99$ ;  $p < 0.001$ ). There were no significant  
49  
50 differences between the first and second SLESIS values (i.e. diagnosis and  
51  
52 comparable time-point to infection) for the matched controls.  
53  
54  
55  
56  
57  
58  
59  
60



1  
2  
3 Figure 1 shows the ROC analysis for SLESIS at diagnosis. The area under the ROC  
4 curve (AUC) was 0.6271 (SD 0.04; 95% CI: 0.56-0.70). We defined three possible cut-  
5 offs to distinguish patients with and without severe infection. We selected the cut-offs  
6 which had classified correctly the maximum percentage of the sample taking into  
7 account sensitivity and specificity. A cut-off for SLESIS at diagnosis  $\geq 3.18$  identified  
8 patients who would develop severe infection with sensitivity 77% and specificity 49%.  
9 For SLESIS  $\geq 3.46$ , sensitivity was 66% and specificity 55%. For SLESIS  $\geq 4.24$ ,  
10 sensitivity was 64% and specificity 60%.  
11  
12  
13  
14  
15  
16  
17  
18  
19  
20  
21  
22  
23  
24

25 Figure 2 shows the ROC curve for SLESIS just prior to the infection. The AUC was  
26 0.79 (SD 0.03 95% CI: 0.73-0.85), which was better than for SLESIS at diagnosis. We  
27 selected three cut-offs:  $\geq 3.67$  identified patients who would develop severe infection  
28 with sensitivity of 90% and specificity of 53%. Similar results were obtained using  
29  $\geq 3.79$  as a cut-off (sensitivity of 90%, specificity of 50%). For SLESIS  $\geq 4.24$ , sensitivity  
30 was 86% and specificity 60%.  
31  
32  
33  
34  
35  
36  
37  
38  
39  
40  
41  
42

## 43 **Discussion**

44  
45  
46  
47 In patients with SLE it has been reported that the prevalence of life-threatening  
48 infections appears to be highest within the first five years after disease onset<sup>23</sup>.  
49 However, severe infection represents a threat throughout the course of the disease,  
50 especially when these patients become older and develop more co-morbidities related  
51 to age. Given the potential mortality in SLE patients due to such infections, it is  
52 pertinent to pursue new options that allow us to predict which groups of patients will  
53  
54  
55  
56  
57  
58  
59  
60

1  
2  
3 have higher risk of developing major infections. Our aim was to develop a risk score  
4 (SLESIS) to aid in this purpose. This study fulfils the important task of testing the  
5 properties of this SLESIS score in a cohort independent of the RELESSER<sup>19,20</sup>  
6 population in which it was developed. Our London cohort differs from the Spanish  
7 cohort in terms of ethnicity but SLESIS still exhibits a valid and statistically significant  
8 association with severe infection.  
9  
10  
11  
12  
13  
14  
15  
16  
17  
18  
19  
20

21 During the last few years, there have been several publications aiming to develop  
22 algorithms that could measure the risk of developing severe infections in patients with  
23 other autoimmune diseases. Crowson<sup>24</sup> *et al* developed a score in order to detect  
24 severe infection promptly in a cohort of 410 patients with RA. The score was designed  
25 and validated to predict the 1-year risk of severe infection whereas SLESIS was  
26 elaborated to predict the risk of severe infection ever. Zink<sup>18</sup> *et al* built a score based  
27 on the RABBIT (Rheumatoid Arthritis Observation of Biologic Therapy) cohort in order  
28 to predict serious infection in patients on biologic treatment, with promising results.  
29 However, the authors suggested that their risk score was valid only in Caucasian  
30 populations in Western Europe. Beca<sup>25</sup> *et al* designed a risk calculator algorithm to  
31 differentiate flares from infections in SLE patients with fever. The study encompassed  
32 130 patients with SLE who presented with fever over a period of 13 years. ROC curve  
33 analysis in both papers showed that both scores were able to predict infection with  
34 AUC between 0.8 and 0.9. Nonetheless, both studies validated the algorithms in  
35 similar cohorts in terms of ethnicity distribution compared to the original cohorts. In  
36 contrast, we selected a validation cohort of patients in a different country, with a  
37 different range of ethnicities. In the Spanish cohort, 93% of patients were Caucasian  
38  
39  
40  
41  
42  
43  
44  
45  
46  
47  
48  
49  
50  
51  
52  
53  
54  
55  
56  
57  
58  
59  
60

1  
2  
3 and fewer than 1% African/Caribbean. In London, 68% were Caucasian and 28%  
4  
5 African/Caribbean, an ethnic group recognised as suffering more severe SLE.  
6  
7  
8  
9  
10

11 Patients with previous severe infection were predisposed to develop major infection  
12 and were also more likely to die during admission for severe infection. Impaired  
13 immune system functions in a sub-group of patients with SLE may contribute to  
14 increase the infection risk in those patients. There are immunological and genetic  
15 disorders that predispose to the development of infections in patients with SLE.  
16 Furthermore, other clinical and treatment factors might play a crucial role in the  
17 predisposition of patients with SLE to develop infection. For instance, the infection  
18 group were more likely than the controls to have had previous hospitalisations for SLE.  
19 These findings are comparable to other previous reports<sup>2, 26 - 28</sup>. In contrast, in the  
20 study of Ruiz-Irastorza *et al*, lung disease was the only clinical manifestation that was  
21 considered a predictor of major infection after the multivariate analysis<sup>29</sup>.  
22  
23  
24  
25  
26  
27  
28  
29  
30  
31  
32  
33  
34  
35  
36  
37  
38  
39  
40

41 In carrying out this project, we noted the fact that a quarter of the patients recorded as  
42 suffering severe infections died during their admission for infection. To investigate this  
43 mortality further, we carried out univariable and multivariable analysis of factors that  
44 could potentially influence whether or not these patients died. Surprisingly, though  
45 previous hospitalization due to SLE was a factor independently associated with  
46 increased risk of severe infection it was also associated with increased chance of  
47 surviving that severe infection, even after multivariable analysis. There is no obvious  
48 explanation for this apparent paradox. Perhaps the threshold for starting antibiotics  
49 was lower in such patients. We considered the possibility that deaths from severe  
50  
51  
52  
53  
54  
55  
56  
57  
58  
59  
60

1  
2  
3 infection had all occurred many years ago, during a period when more patients were  
4 treated with high dose IS such as cyclophosphamide. However, this is not the case as  
5  
6  
7  
8 12 patients died between 2000 and 2012 while the other 14 died before the year 2000.  
9

10  
11  
12  
13  
14 SLESIS was significantly higher just before the severe infection in comparison to the  
15 value at the diagnosis of SLE. This reinforces the idea that repeated measurement of  
16  
17  
18 SLESIS may be a helpful clinical assessment tool. As lupus activity and treatment  
19 change over time, it is predictable that SLESIS would change over time, but it was  
20  
21  
22 important to investigate whether this makes SLESIS at diagnosis a poorer predictor of  
23  
24  
25 infection. Development of chronic damage over time, as well as cumulative use of  
26  
27  
28 corticosteroids and immunosuppressive drugs could contribute to these changes in  
29  
30  
31 SLESIS related to increased infection risk. In line with other reports<sup>30 31</sup>, we found that  
32  
33  
34 ever-use of corticosteroids  $\geq 10$  mg/day was associated with increased infection risk.  
35  
36  
37 In fact, more than 50% of patients of our cohort who suffered from severe infections  
38  
39  
40 had been treated with  $\geq 10$  mg/day of corticosteroids. Other immunosuppressive  
41  
42  
43 treatments have been associated with high risk of infections although results have  
44  
45  
46 been controversial among the different cohorts<sup>31</sup>. In our study, cyclophosphamide and  
47  
48  
49 azathioprine were associated with increased risk of severe infection in the univariate  
50  
51  
52 analysis but that significance was lost after the multivariable analysis.

53  
54  
55 There was a trend with hydroxychloroquine (HCQ) which seemed to be the opposite  
56  
57  
58 direction to corticosteroids or immunosuppressants, since fewer patients in the study  
59  
60  
61 group than the control group had ever been treated with HCQ. This finding is in  
62  
63  
64 agreement with previous reports<sup>29 32</sup> although in our study, it did not reach statistical

1  
2  
3 significance. Ruiz-Irastorza<sup>29</sup> *et al.* found that patients taking antimalarials were 16  
4 times less likely to suffer a major infection. Similarly, Sisó<sup>32</sup> *et al.*, found a lower  
5 frequency of infections among those previously treated with antimalarials in a  
6 retrospective study. Bultink *et al.*, in a study designed to analyse the effect of the  
7 deficiency of functional mannose-binding lectin, also found that treatment with HCQ  
8 was associated with fewer severe infections although the authors attributed this  
9 association to the presumed lesser severity of lupus patients who take HCQ<sup>33</sup>.

10  
11  
12  
13  
14  
15  
16  
17  
18  
19  
20  
21  
22  
23 Overall, the AUC in our study were not as high as for previous scores developed for  
24 RA<sup>18 24</sup>. However, this is the first score that has been developed to predict severe  
25 infections in SLE and may represent a first step in developing tools to do this  
26 accurately. We acknowledge several limitations in our study. Firstly, the retrospective  
27 design of the study. Secondly, the ethnicity item in SLESIS distinguishes only Latin  
28 American ethnicity as a separate group, which was not helpful in the London  
29 population. A modified SLESIS including HR for other ethnic groups would be more  
30 widely applicable globally but could not have been derived from the RELESSER cohort  
31 (too ethnically homogeneous) or the UCL cohort (too small). Thirdly, the Katz index  
32 used by RELESSER is a simple and helpful measure of disease severity (not just  
33 activity) but is not widely used in clinical practice. However, in the original RELESSER  
34 study<sup>17</sup>, from which SLESIS was derived, SLICC/ACR/Damage Index (SDI), Katz  
35 Index and SELENA-SLEDAI activity score were all measured and the Katz Index was  
36 the only one statistically associated with severe infection. Notwithstanding these  
37 limitations, we have shown that SLESIS at diagnosis was significantly higher in the  
38 group of patients who later suffered severe infections than in the control group of SLE  
39 patients who did not suffer severe infection.

1  
2  
3  
4  
5  
6 How might SLESIS be used in clinical practice? It is important to bear in mind that both  
7  
8 sensitivity and specificity for severe infection were modest for SLESIS at diagnosis.  
9  
10 For SLESIS just before the infection, sensitivity was high (90%) but specificity was low  
11  
12 (54%). The low specificity means that SLESIS could not be used to decide upon use  
13  
14 of management measures with a high risk of adverse effects. We would suggest that  
15  
16 patients with high SLESIS (>3.5) at any point could be followed-up with a higher index  
17  
18 of suspicion for infection and lower threshold for using antibiotics. SLESIS at  
19  
20 diagnosis, together with other factors, might also help in deciding which patients might  
21  
22 benefit from vaccination against bacterial infections (e.g. pneumococcus) and  
23  
24 considering benefit-risk balance of corticosteroids ( $\geq 10\text{mg/day}$ ) and other  
25  
26 immunosuppressants.  
27  
28  
29  
30  
31  
32  
33  
34  
35  
36  
37  
38  
39  
40  
41  
42  
43  
44  
45  
46  
47  
48  
49  
50  
51  
52  
53  
54  
55  
56  
57  
58  
59  
60

In summary, despite the limitations, our study has demonstrated strong arguments to perform future prospective studies to assess if SLESIS, or an improved form of SLESIS, could be clinically useful in the early diagnosis and prevention of severe infections in patients with SLE.

## ACKNOWLEDGEMENTS

The authors would like to acknowledge the researchers of the RELESSER group and Research Unit of Spanish Society of Rheumatology, who carried out the original study from which SLESIS was derived (Ref 17). BTS, CW, DI and AR work in a department supported by the National Institute for Health Research University College London Hospitals Biomedical Research Centre.

## DATA AVAILABILITY STATEMENT

No additional data available.

## CONTRIBUTORSHIP STATEMENT

AR and BTS designed the study. IRF, JMPR and VCP developed the SLESIS score and advised on design of the study. BTS, AR, CW and DI collected the data. BTS and VCP carried out the statistical analysis. BTS, JMPR, IRF, VCP, DI and AR all took part in interpreting the results and writing the final manuscript.

## CONFLICT OF INTEREST STATEMENT

None of the authors have any conflicts of interest to disclose.

## FUNDING

1  
2  
3 This work was supported by the National Institute for Health Research University  
4 College London Hospitals Biomedical Research Centre and the Spanish Foundation  
5  
6 of Rheumatology (FER).  
7  
8  
9  
10  
11  
12  
13  
14  
15  
16  
17  
18  
19  
20  
21  
22  
23  
24  
25  
26  
27  
28  
29  
30  
31  
32  
33  
34  
35  
36  
37  
38  
39  
40  
41  
42  
43  
44  
45  
46  
47  
48  
49  
50  
51  
52  
53  
54  
55  
56  
57  
58  
59  
60

For peer review only



## References

1. Iliopoulos AG, Tsokos GC. Immunopathogenesis and spectrum of infections in systemic lupus erythematosus. *Semin Arthritis Rheum* 1996;25(5):318-36.
2. Goldblatt F, Chambers S, Rahman A, et al. Serious infections in British patients with systemic lupus erythematosus: hospitalisations and mortality. *Lupus* 2009;18(8):682-9.
3. Cervera R, Khamashta MA, Font J, et al. Morbidity and mortality in systemic lupus erythematosus during a 5-year period. A multicenter prospective study of 1,000 patients. European Working Party on Systemic Lupus Erythematosus. *Medicine (Baltimore)* 1999;78(3):167-75.
4. Jacobsen S, Petersen J, Ullman S, et al. A multicentre study of 513 Danish patients with systemic lupus erythematosus. II. Disease mortality and clinical factors of prognostic value. *Clin Rheumatol* 1998;17(6):478-84.
5. Hernandez-Cruz B, Tapia N, Villa-Romero AR, et al. Risk factors associated with mortality in systemic lupus erythematosus. A case-control study in a tertiary care center in Mexico City. *Clin Exp Rheumatol* 2001;19(4):395-401.
6. Kang I, Park SH. Infectious complications in SLE after immunosuppressive therapies. *Curr Opin Rheumatol* 2003;15(5):528-34.
7. Molina H. Update on complement in the pathogenesis of systemic lupus erythematosus. *Curr Opin Rheumatol* 2002;14(5):492-7.
8. Garred P, Voss A, Madsen HO, et al. Association of mannose-binding lectin gene variation with disease severity and infections in a population-based cohort of systemic lupus erythematosus patients. *Genes Immun* 2001;2(8):442-50.
9. Cuchacovich R, Gedalia A. Pathophysiology and clinical spectrum of infections in systemic lupus erythematosus. *Rheum Dis Clin North Am* 2009;35(1):75-93.
10. Ucar Angulo E, Rivera Garcia N. [Comorbidity of systemic lupus erythematosus]. *Reumatologia clinica* 2008;4 Suppl 1:17-21.
11. Zandman-Goddard G, Shoenfeld Y. Infections and SLE. *Autoimmunity* 2005;38(7):473-85.
12. Fessler BJ. Infectious diseases in systemic lupus erythematosus: risk factors, management and prophylaxis. *Best Pract Res Clin Rheumatol* 2002;16(2):281-91.
13. Danza A, Ruiz-Irastorza G. Infection risk in systemic lupus erythematosus patients: susceptibility factors and preventive strategies. *Lupus* 2013;22(12):1286-94.
14. Falagas ME, Manta KG, Betsi GI, et al. Infection-related morbidity and mortality in patients with connective tissue diseases: a systematic review. *Clin Rheumatol* 2007;26(5):663-70.
15. Edwards CJ, Lian TY, Badsha H, et al. Hospitalization of individuals with systemic lupus erythematosus: characteristics and predictors of outcome. *Lupus* 2003;12(9):672-6.
16. Ward MM. Avoidable hospitalizations in patients with systemic lupus erythematosus. *Arthritis Rheum* 2008;59(2):162-8.
17. Rua-Figueroa I, Lopez-Longo J, Galindo-Izquierdo M, et al. Incidence, associated factors and clinical impact of severe infections in a large, multicentric cohort of patients with systemic lupus erythematosus. *Semin Arthritis Rheum* 2017;47(1):38-45.
18. Zink A, Manger B, Kaufmann J, Eisterhues C, et al. Evaluation of the RABBIT Risk Score for serious infections. *Ann Rheum Dis* 2014;73(9):1673-6.
19. Rua-Figueroa I, Lopez-Longo FJ, Calvo-Alen J, et al. National registry of patients with systemic lupus erythematosus of the Spanish Society of Rheumatology: objectives and methodology. *Reumatologia clinica* 2014;10(1):17-24.
20. Pego-Reigosa JM, Rua-Figueroa I, Lopez-Longo FJ, et al. Analysis of disease activity and response to treatment in a large Spanish cohort of patients with systemic lupus erythematosus. *Lupus* 2015;24(7):720-9.
21. Katz JD, Senecal JL, Rivest C, et al. A simple severity of disease index for systemic lupus erythematosus. *Lupus* 1993;2(2):119-23.

- 1
- 2
- 3
- 4 22. Hochberg MC. Updating the American College of Rheumatology revised criteria for the
- 5 classification of systemic lupus erythematosus. *Arthritis Rheum* 1997;40(9):1725.
- 6
- 7 23. Cervera R, Khamashta MA, Font J, et al. Morbidity and mortality in systemic lupus erythematosus
- 8 during a 10-year period: a comparison of early and late manifestations in a cohort of 1,000
- 9 patients. *Medicine (Baltimore)* 2003;82(5):299-308.
- 10
- 11 24. Crowson CS, Hoganson DD, Fitz-Gibbon PD, et al. Development and validation of a risk score for
- 12 serious infection in patients with rheumatoid arthritis. *Arthritis Rheum* 2012;64(9):2847-55.
- 13
- 14 25. Beca S, Rodriguez-Pinto I, Alba MA, et al. Development and validation of a risk calculator to
- 15 differentiate flares from infections in systemic lupus erythematosus patients with fever.
- 16 *Autoimmun Rev* 2015;14(7):586-93.
- 17
- 18 26. Goldblatt F, Yuste J, Isenberg DA, et al. Impaired C3b/iC3b deposition on *Streptococcus*
- 19 *pneumoniae* in serum from patients with systemic lupus erythematosus. *Rheumatology*
- 20 *(Oxford)* 2009;48(12):1498-501.
- 21
- 22 27. Duffy KN, Duffy CM, Gladman DD. Infection and disease activity in systemic lupus erythematosus:
- 23 a review of hospitalized patients. *J Rheumatol* 1991;18(8):1180-4.
- 24
- 25 28. Noel V, Lortholary O, Casassus P, et al. Risk factors and prognostic influence of infection in a single
- 26 cohort of 87 adults with systemic lupus erythematosus. *Ann Rheum Dis* 2001;60(12):1141-4.
- 27
- 28 29. Ruiz-Irastorza G, Olivares N, Ruiz-Arruza I, et al. Predictors of major infections in systemic lupus
- 29 erythematosus. *Arthritis Res Ther* 2009;11(4):R109.
- 30
- 31 30. Pryor BD, Bologna SG, Kahl LE. Risk factors for serious infection during treatment with
- 32 cyclophosphamide and high-dose corticosteroids for systemic lupus erythematosus. *Arthritis*
- 33 *Rheum* 1996;39(9):1475-82.
- 34
- 35 31. Gladman DD, Hussain F, Ibanez D, et al. The nature and outcome of infection in systemic lupus
- 36 erythematosus. *Lupus* 2002;11(4):234-9.
- 37
- 38 32. Siso A, Ramos-Casals M, Bove A, et al. Previous antimalarial therapy in patients diagnosed with
- 39 lupus nephritis: influence on outcomes and survival. *Lupus* 2008;17(4):281-8.
- 40
- 41 33. Bultink IE, Hamann D, Seelen MA, et al. Deficiency of functional mannose-binding lectin is not
- 42 associated with infections in patients with systemic lupus erythematosus. *Arthritis Res Ther*
- 43 2006;8(6):R183.
- 44
- 45
- 46
- 47
- 48
- 49
- 50
- 51
- 52
- 53
- 54
- 55
- 56
- 57
- 58
- 59
- 60

**Table 1 Variables incorporated into SLEIS**

| Variable                                                            | Beta Coefficient | Hazard ratio (HR) for severe infection | 95% confidence interval |
|---------------------------------------------------------------------|------------------|----------------------------------------|-------------------------|
| <b>Age at diagnosis (&gt;46 years old)</b>                          | 0.1163           | 1.12                                   | 1.07 – 1.18             |
| <b>Latin American ethnicity</b>                                     | 0.427            | 2.40                                   | 2.29 – 2.5              |
| <b>Current dose of corticosteroids <math>\geq 10</math> mg/day)</b> | 0.2878           | 1.33                                   | 1.15 – 1.55             |
| <b>Sex=male</b>                                                     | 0.3692           | 1.49                                   | 1.22 – 1.81             |
| <b>Previous hospitalization for SLE</b>                             | 1.0049           | 2.73                                   | 2.22 – 3.35             |
| <b>Katz Index<sup>21</sup></b>                                      | 0.062            | 1.06                                   | 1.03 – 1.1              |
| <b>Each previous severe infection</b>                               | 0.8739           | 2.40                                   | 2.29 – 2.50             |

**Footnote**

These HR values were derived from the retrospective analysis of 3,658 Spanish patients described in reference 17.

**Table 2. Descriptive data: SLE patients with infection vs without infection**

|                                                       | Study (infection) group (n=98) | Control (non infection) group (n=111) | P value      |
|-------------------------------------------------------|--------------------------------|---------------------------------------|--------------|
| <b>Gender, n (%)</b>                                  |                                |                                       |              |
| - Females                                             | 90 (92)                        | 103 (93)                              | ns           |
| - Males                                               | 8 (8)                          | 8 (7)                                 |              |
| <b>Median age at diagnosis of SLE (IQR), years</b>    | 30.5 (27)                      | 31 (18)                               | ns           |
| <b>Median age at time of infection (IQR), years</b>   | 43 (25)                        | Not applicable                        |              |
| <b>Ethnicity, n (%)</b>                               |                                |                                       |              |
| - Caucasian                                           | 48 (49)                        | 72 (65)                               | ns           |
| - Hispanics                                           | 3 (3)                          | 2 (2)                                 |              |
| - Afro-Caribbean                                      | 28 (29)                        | 20 (18)                               |              |
| - Asian                                               | 7 (7)                          | 6 (5)                                 |              |
| - Other                                               | 12 (12)                        | 12 (11)                               |              |
| <b>Median length of follow-up (IQR), years</b>        | 9.5 (14)                       | 14 (9)                                | ns           |
| <b>Previous infection before SLE diagnosis, n (%)</b> | 16 (16)                        | 3 (2)                                 | <b>0.001</b> |

|                                                                                                                                  |                                                   |         |          |                   |
|----------------------------------------------------------------------------------------------------------------------------------|---------------------------------------------------|---------|----------|-------------------|
| 1<br>2<br>3<br>4<br>5<br>6<br>7                                                                                                  | <b>Previous hospitalizations due to SLE n (%)</b> | 55 (56) | 36 (32)  | <b>0.001</b>      |
| 8<br>9<br>10<br>11<br>12                                                                                                         | <b>SLE main features (cumulative) n, (%)</b>      |         |          |                   |
| 13                                                                                                                               | - Skin disease                                    | 76 (78) | 67 (60)  | <b>0.012</b>      |
| 14                                                                                                                               | - Joint disease                                   | 72 (74) | 101 (91) | <b>0.001</b>      |
| 15                                                                                                                               | - Renal disease                                   | 42 (43) | 29 (26)  | <b>0.011</b>      |
| 16                                                                                                                               | - CNS disease                                     | 13 (13) | 12 (11)  | ns                |
| 17                                                                                                                               | - Serositis                                       | 19 (19) | 33 (30)  | ns                |
| 18<br>19<br>20<br>21<br>22<br>23<br>24                                                                                           | <b>Previous drug treatment n (%)</b>              |         |          |                   |
| 25                                                                                                                               | - Corticosteroids                                 | 89 (91) | 43 (39)  | <b>&lt;0.001</b>  |
| 26                                                                                                                               | - Corticosteroids                                 | 54 (55) | 6 (5)    | <b>&lt; 0.001</b> |
| 27                                                                                                                               | (≥10mg per day at                                 |         |          |                   |
| 28                                                                                                                               | any time)                                         |         |          |                   |
| 29                                                                                                                               | - No                                              | 32 (33) | 25 (23)  | ns                |
| 30                                                                                                                               | Hydroxichloroquine                                |         |          |                   |
| 31                                                                                                                               | - Azathioprine                                    | 47 (48) | 35 (32)  | <b>0.015</b>      |
| 32                                                                                                                               | - Mycophenolate                                   | 36 (35) | 28 (25)  | ns                |
| 33                                                                                                                               | - Cyclophosphamide                                | 28 (29) | 13 (13)  | <b>0.004</b>      |
| 34                                                                                                                               | - Rituximab                                       | 26 (27) | 25 (23)  | ns                |
| 35<br>36<br>37<br>38<br>39<br>40<br>41<br>42<br>43<br>44<br>45<br>46<br>47<br>48<br>49<br>50<br>51<br>52<br>53<br>54<br>55<br>56 | <b>Laboratory data, n(%) at</b>                   |         |          |                   |

|                                 |         |         |              |
|---------------------------------|---------|---------|--------------|
| <b>any time</b>                 |         |         |              |
| - Neutropenia                   | 33 (34) | 19 (17) | <b>0.006</b> |
| - Lymphopenia                   | 76 (78) | 73(66)  | ns           |
| - Anti-dsDNA +                  | 67 (68) | 66 (60) | ns           |
| - Low C3                        | 57 (58) | 50 (45) | ns           |
| <b>Outcomes</b>                 |         |         |              |
| - Deaths                        | 26 (27) | 2 (2)   | <b>0.03</b>  |
| - Patients with >1<br>infection | 18 (18) | 0       |              |

**Table 3- Comparison of patients who died during admission for severe infection and those who survived**

|                                                                | <b>Deceased Patients<br/>n=26 (26.5%)</b> | <b>Alive patients<br/>n=72 (73.5%)</b> | <b>P value</b>   |
|----------------------------------------------------------------|-------------------------------------------|----------------------------------------|------------------|
| <b>Mean age at diagnosis (SD)</b>                              | 33.8 (14.1)                               | 31.2 (15.1)                            | ns               |
| <b>Mean age at infection (SD)</b>                              | 42.88 (16.7)                              | 40.88 (16.7)                           | ns               |
| <b>Follow-up between diagnosis and first infection (years)</b> | 9.11 (7.04)                               | 10.8 (10.3)                            | ns               |
| <b>Ethnicity n, (%)</b>                                        |                                           |                                        |                  |
| - Caucasian                                                    | 16 (61.5)                                 | 31(43.1)                               |                  |
| - Hispanics                                                    | NA                                        | 3 (4.2)                                |                  |
| - Afro-Caribbean                                               | 8 (30.8)                                  | 20 (27.8)                              | ns               |
| - Asian                                                        | 2 (7.7)                                   | 4 (5.6)                                |                  |
| - Others                                                       | NA                                        | 12 (16.7)                              |                  |
| <b>Gender (female), n (%)</b>                                  | 25 (96)                                   | 65 (90)                                | ns               |
| <b>Previous hospitalizations, n (%)</b>                        | 2 (8)                                     | 53 (74)                                | <b>&lt;0.001</b> |

|                                                          |         |         |              |
|----------------------------------------------------------|---------|---------|--------------|
| Previous severe infection before diagnosis of SLE, n (%) | 9(35)   | 7(10)   | <b>0.003</b> |
| Skin disease, n (%)                                      | 18 (69) | 58 (81) | ns           |
| Renal disease, n (%)                                     | 10 (39) | 32 (44) | ns           |
| Joint disease, n (%)                                     | 22 (85) | 50 (69) | ns           |
| CNS disease, n (%)                                       | 4 (15)  | 9 (13)  | ns           |
| Serositis, n (%)                                         | 7 (27)  | 12 (17) | ns           |
| Corticosteroids per day at any time), n (%)              | 20 (77) | 69 (96) | <b>0.02</b>  |
| Corticosteroids $\geq$ 10 mg/day at any time, n (%)      | 17 (65) | 37 (51) | ns           |
| Hydroxychloroquine, n (%)                                | 20 (77) | 46 (64) | ns           |
| Rituximab , n (%)                                        | 1 (4)   | 25 (35) | <b>0.002</b> |
| Cyclophosphamide, n (%)                                  | 11 (42) | 17 (24) | ns           |
| Azathioprine, n (%)                                      | 14 (54) | 33 (46) | ns           |
| Mycophenolate, n (%)                                     | 10 (39) | 26 (36) | ns           |
| Splenectomy, n (%)                                       | 0       | 3 (4)   | ns           |
| Bacteraemia, n (%)                                       | 4 (15)  | 9 (13)  | ns           |



|                                          |         |         |                  |
|------------------------------------------|---------|---------|------------------|
| <b>Multiple organ involvement, n (%)</b> | 12 (46) | 5 (7)   | <b>&lt;0.001</b> |
| <b>Low complement, n (%)</b>             | 11 (42) | 46 (64) | ns               |
| <b>Neutropenia, n (%)</b>                | 5 (19)  | 28 (39) | ns               |
| <b>Lymphopenia, n (%)</b>                | 20 (77) | 56 (78) | ns               |
| <b>a-dsDNA, n (%)</b>                    | 20 (77) | 47 (65) | ns               |

For peer review only

**Figure 1. ROC Curve analysis-SLESIS at diagnosis**

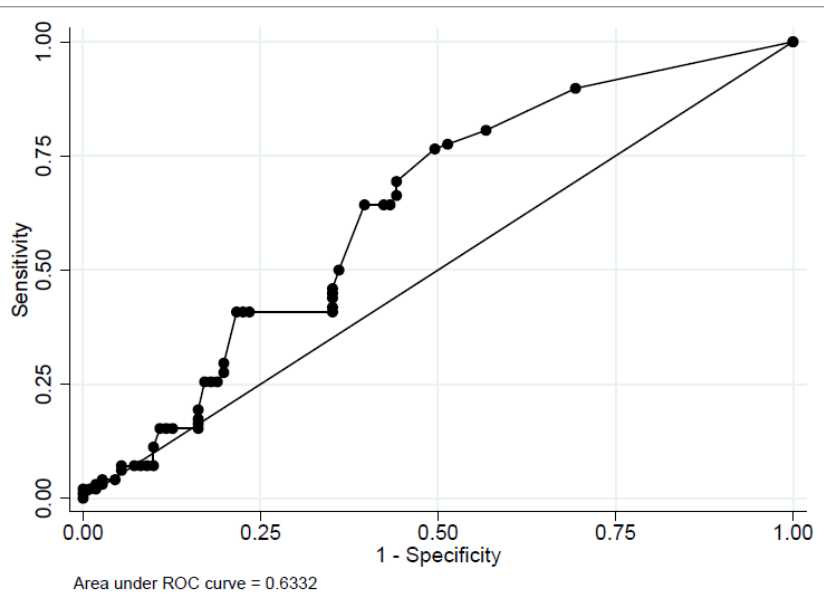

Peer review only

**Figure 2- ROC Curve Analysis- SLEIS before infection**

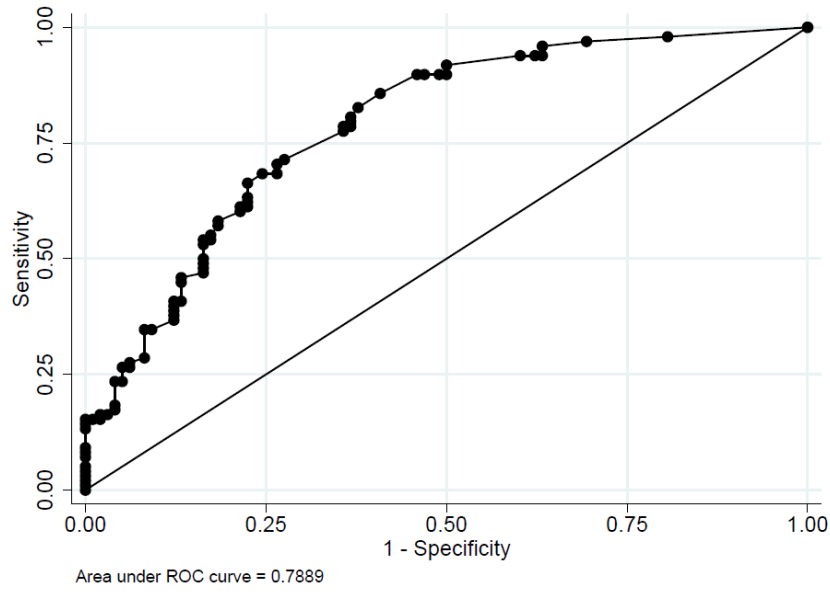

# BMJ Open

## Can we validate a clinical score to predict the risk of severe infection in patients with systemic lupus erythematosus? A longitudinal retrospective study in a British Cohort

|                                 |                                                                                                                                                                                                                                                                                                                                                                                                                                                                                                                                                                                                                                                                                                                                                                                                                                                                                                                    |
|---------------------------------|--------------------------------------------------------------------------------------------------------------------------------------------------------------------------------------------------------------------------------------------------------------------------------------------------------------------------------------------------------------------------------------------------------------------------------------------------------------------------------------------------------------------------------------------------------------------------------------------------------------------------------------------------------------------------------------------------------------------------------------------------------------------------------------------------------------------------------------------------------------------------------------------------------------------|
| Journal:                        | <i>BMJ Open</i>                                                                                                                                                                                                                                                                                                                                                                                                                                                                                                                                                                                                                                                                                                                                                                                                                                                                                                    |
| Manuscript ID                   | bmjopen-2018-028697.R1                                                                                                                                                                                                                                                                                                                                                                                                                                                                                                                                                                                                                                                                                                                                                                                                                                                                                             |
| Article Type:                   | Research                                                                                                                                                                                                                                                                                                                                                                                                                                                                                                                                                                                                                                                                                                                                                                                                                                                                                                           |
| Date Submitted by the Author:   | 09-Mar-2019                                                                                                                                                                                                                                                                                                                                                                                                                                                                                                                                                                                                                                                                                                                                                                                                                                                                                                        |
| Complete List of Authors:       | Tejera Segura, Beatriz; University College London, Centre for Rheumatology Research<br>Rua-Figueroa, Iñigo; Doctor Negrín University Hospital of Gran Canaria, Rheumatology Department, ; RELESSER Group (Spanish Rheumatology Society Lupus Registry)<br>Pego-Reigosa, Jose Maria; Rheumatology Department, University Hospital Vigo, IRIDIS Group, Instituto de Investigación Sanitaria Galicia Sur (IISGS) , Rheumatology Department; Group (Spanish Rheumatology Society Lupus Registry)<br>del Campo, Victor; University Hospital Vigo, IRIDIS Group , Instituto de Investigación Sanitaria Galicia Sur (IISGS), Preventive Medicine and Epidemiology Department<br>Wincup, Chris; University College London, Centre for Rheumatology Research<br>Isenberg, David; University College London, Centre for Rheumatology Research<br>Rahman, Anisur; University College London, Centre for Rheumatology Research |
| <b>Primary Subject Heading</b>: | Rheumatology                                                                                                                                                                                                                                                                                                                                                                                                                                                                                                                                                                                                                                                                                                                                                                                                                                                                                                       |
| Secondary Subject Heading:      | Infectious diseases                                                                                                                                                                                                                                                                                                                                                                                                                                                                                                                                                                                                                                                                                                                                                                                                                                                                                                |
| Keywords:                       | Systemic lupus erythematosus, severe infection, risk score                                                                                                                                                                                                                                                                                                                                                                                                                                                                                                                                                                                                                                                                                                                                                                                                                                                         |
|                                 |                                                                                                                                                                                                                                                                                                                                                                                                                                                                                                                                                                                                                                                                                                                                                                                                                                                                                                                    |

SCHOLARONE™  
Manuscripts

1  
2  
3 **Can we validate a clinical score to predict the risk of severe infection in patients**  
4 **with systemic lupus erythematosus? A longitudinal retrospective study in a**  
5  
6 **British Cohort**  
7  
8

9  
10 Beatriz Tejera Segura MD<sup>1</sup>, Iñigo Rua-Figueroa MD<sup>2-5</sup>, José María Pego-Reigosa  
11 MD<sup>3-5</sup>, Victor del Campo MD<sup>4</sup>, Chris Wincup MD<sup>1</sup>, David Isenberg MD FRCP<sup>1</sup> and  
12  
13 Anisur Rahman PhD FRCP<sup>1</sup>  
14  
15

16  
17  
18 <sup>1</sup>Centre for Rheumatology Research, University College London, London, UK  
19

20  
21 <sup>2</sup> Rheumatology Department, Doctor Negrín University Hospital of Gran Canaria,  
22 Spain.  
23  
24

25  
26 <sup>3</sup>Rheumatology Department, University Hospital Vigo, IRIDIS Group, Instituto de  
27 Investigación Sanitaria Galicia Sur (IISGS) , Vigo, Spain.  
28  
29

30  
31 <sup>4</sup>Preventive Medicine and Epidemiology Department, University Hospital Vigo, IRIDIS  
32 Group , Instituto de Investigación Sanitaria Galicia Sur (IISGS), Vigo, Spain.  
33  
34

35  
36 <sup>5</sup>RELESSER Group (Spanish Rheumatology Society Lupus Registry)  
37  
38

39  
40  
41 **Running Head**  
42

43  
44 A score to predict severe infection in SLE  
45  
46

47 **Corresponding Author**  
48

49  
50 Professor Anisur Rahman  
51

52  
53 Centre for Rheumatology Research, Division of Medicine  
54

55  
56 Fourth Floor Rayne Institute  
57

58  
59 5 University Street  
60

1  
2  
3 London WC1E 6JF  
4  
5

6 United Kingdom  
7  
8

9 Tel +442031082168  
10  
11

12 e-mail anisur.rahman@ucl.ac.uk  
13  
14  
15  
16  
17  
18  
19  
20  
21  
22  
23  
24  
25  
26  
27  
28  
29  
30  
31  
32  
33  
34  
35  
36  
37  
38  
39  
40  
41  
42  
43  
44  
45  
46  
47  
48  
49  
50  
51  
52  
53  
54  
55  
56  
57  
58  
59  
60

For peer review only

## **Abstract**

Objective. Severe infections are a major cause of morbidity and mortality in patients with systemic lupus erythematosus (SLE). Our primary objective was to use data from a large Spanish cohort to develop a risk score for severe infection in SLE, the SLE Severe Infection Score (SLESIS) and to validate SLESIS in a separate cohort of 699 British patients.

Design and setting. Retrospective longitudinal study in a specialist tertiary care clinic in London UK.

Participants. Patients fulfilling international classification criteria for SLE (n=209). This included 98 patients who had suffered severe infections (defined as infection leading to hospitalization and/or death) and 111 randomly selected patients who had never suffered severe infections.

Outcomes. We retrospectively calculated SLESIS at diagnosis for all 209 patients. For the infection cases we also calculated SLESIS just prior to infection and compared it to SLESIS in 98 controls matched for disease duration. We carried out receiver operator characteristic (ROC) analysis to quantify predictive value of SLESIS for severe infection.

Results. Median SLESIS (IQR) at diagnosis was higher in the infection group than in the control group (4.27 (3.18) vs. 2.55 (3.79),  $p=0.0008$ ). Median SLESIS prior to infection was higher than at diagnosis (6.64 vs. 4.27,  $p<0.001$ ). In ROC analysis, predictive value of SLESIS just before the infection (Area Under Curve=0.79) was higher than that of SLESIS at diagnosis (AUC=0.63).

1  
2  
3 Conclusions. We validated the association of SLESIS with severe infection in an  
4 independent cohort. Calculation of SLESIS at each clinic visit may help in  
5 management of infection risk in patients with SLE. Prospective studies are needed to  
6 confirm these findings.  
7  
8  
9  
10  
11  
12  
13  
14  
15

### 16 **Strengths and limitations**

- 17  
18  
19 1) We developed an algorithm (SLESIS) designed to predict the risk of severe  
20 infections in SLE patients that could be a useful tool in clinical practice.  
21  
22
- 23 2) SLESIS was developed using data from a Spanish lupus registry (RELESSER)  
24 that includes almost 4000 SLE patients.  
25  
26
- 27 3) We applied the algorithm in a British cohort of 699 patients with SLE in order to  
28 validate it.  
29  
30
- 31 4) The algorithm consists of seven variables that are all obtainable from  
32 information obtained in routine clinical practice.  
33  
34
- 35 5) We acknowledge several limitations: the retrospective design of the study, the  
36 different ethnicity in the Spanish and British population and the Katz Index as  
37 an item of the score.  
38  
39  
40  
41  
42  
43  
44

### 45 **Key Words**

46 Systemic lupus erythematosus, severe infection, risk score.  
47  
48  
49  
50  
51  
52  
53  
54  
55  
56  
57  
58  
59  
60



## Introduction

Systemic lupus erythematosus (SLE) is a systemic autoimmune disease that mainly presents in women aged between 30 and 50 years. Infection is a major cause of morbidity and mortality in patients with SLE, being responsible for 11-45% of hospitalizations as well as 20-55% of deaths, according to different studies<sup>1-6</sup>.

There are immunological and genetic disorders that predispose to the development of infections in patients with SLE<sup>7,8</sup>. Respiratory tract infections are the most common infections in these patients, and bacteremia the leading cause of mortality. Regarding the etiology, pathogenic bacteria are most frequently involved in the infection, followed by viruses and fungi<sup>9,10</sup>.

There are several well-established risk factors for infection such as age at diagnosis, male sex, ethnicity and use of corticosteroids, among others; however, the independent contribution of each factor is not well understood<sup>11-14</sup>. On the other hand, severe infections have been associated with decreased survival of patients with SLE, acting as an independent risk factor for mortality at 10 years after diagnosis<sup>2-4, 14</sup>.

This information about the risk factors associated with infection in SLE has not yet been combined into tools to estimate the risk of severe infection in individual patients over time. The development of an algorithm for predicting the risk of severe infection could be very useful to monitor risk factors more closely in a weighted way. It could allow us to implement prophylactic measures such as vaccination in the highest risk

1  
2  
3 patients and to consider early intervention such as antibiotic therapy in this group of  
4  
5 patients with the ultimate goal of reducing morbidity and improving survival<sup>15-17</sup>. Similar  
6  
7 scores to predict risk of severe infection have been developed and validated in patients  
8  
9 with rheumatoid arthritis (RA) with encouraging results<sup>18</sup>.

10  
11  
12  
13  
14  
15  
16 In a recent original study from Spanish Society of Rheumatology Lupus Registry  
17  
18 (RELESSER), the authors studied 3,658 patients with SLE, of whom 705 (19.3%) had  
19  
20 suffered one or more severe infections. A multivariable Cox regression model for  
21  
22 repeated events (Andersen Gill) was used to define the impact of a range of  
23  
24 demographic and clinical variables on the risk of developing severe infection,  
25  
26 expressed as Hazard Ratio (HR) of developing severe infection for patients with each  
27  
28 associated factor, compared to those without that factor<sup>17</sup>. Seven factors had HR more  
29  
30 than 1.  
31  
32  
33  
34  
35  
36  
37  
38

39 In the study reported in the current paper these seven factors were used to generate  
40  
41 a score – the Systemic Lupus Erythematosus Severe Infection Score (SLESIS),  
42  
43 designed to predict the risk that a patient with lupus will develop a severe infection.  
44  
45  
46  
47  
48

49 The overarching primary objective of the current study was to validate SLESIS in an  
50  
51 independent population of patients with SLE from London, UK.  
52  
53  
54  
55  
56  
57

58 In the validation cohort, we aimed to answer three questions.  
59  
60

1  
2  
3 1) Does the SLESIS at the time of diagnosis predict future severe infection?  
4  
5

6 2) In patients who suffer a severe infection, does the SLESIS change between  
7  
8 diagnosis and the time of infection?  
9

10  
11 3) Does the SLESIS just prior to an infection predict future severe infection?  
12  
13

14  
15 If 2) and 3) are true, it could support assessing SLESIS at every appointment rather  
16  
17 than only at diagnosis.  
18  
19

## 20 21 22 23 24 25 **Patients and Methods** 26

### 27 28 29 30 ***Development and definition of SLESIS*** 31

32  
33  
34  
35  
36  
37 The SLESIS score was developed using data from the RELESSER (Spanish Society  
38  
39 of Rheumatology Lupus Registry) cohort of 3,658 SLE patients who meet  $\geq 4$   
40

41  
42 ACR classification criteria for SLE. The variables, definitions and methodological  
43  
44 characteristics of the RELESSER registry have previously been described in detail<sup>19</sup>  
45  
46

47  
48  
49  
50  
51  
52  
53  
54  
55  
56  
57  
58  
59  
60  
20.

53 Table 1 shows the 7 factors that were found to be associated with increased risk of  
54  
55 developing severe infection (defined as infection leading to hospitalization and/or  
56  
57  
58  
59  
60

1  
2  
3 death) in the RELESSER paper<sup>17</sup> together with the Hazard Ratio (HR) for severe  
4  
5 infection associated with each factor.  
6  
7  
8  
9

10  
11 There are four factors that are graded present or absent; age at diagnosis > 46 years  
12 (HR = 1.12); Latin American ethnicity (HR = 2.4); dose of corticosteroid  $\geq$  10 mg/day  
13 (HR = 1.33); and male sex (HR = 1.49). For each of these factors, the contribution to  
14  
15 SLEIS is either 0 (if absent) or 1xHR (if present).  
16  
17  
18  
19

20  
21  
22  
23  
24  
25 One factor (Katz Index<sup>21</sup> of disease severity) is a continuous variable. The contribution  
26  
27 of this factor is its absolute value x 1.06 (its HR).  
28  
29

30  
31  
32  
33 The other factors are previous hospitalizations for SLE (HR = 2.73) and previous  
34  
35 severe infection (HR = 2.40). For these factors the contribution to SLEIS is the  
36  
37 number of events x HR.  
38  
39

40  
41  
42  
43  
44 Thus the SLEIS for a female Latin American patient, diagnosed at age 22, taking  
45  
46 12mg prednisolone per day with Katz Index of 2, two previous hospitalisations for SLE  
47  
48 and no previous severe infections would be calculated as follows.  
49

50  
51  
52  $(0 \times 1.12) + (1 \times 2.4) + (1 \times 1.33) + (1 \times 1.49) + (2 \times 1.06) + (2 \times 2.73) + (0 \times 2.40) = 11.31$ .  
53  
54  
55  
56  
57  
58  
59  
60

1  
2  
3 Conversely the SLESIS for a male Chinese patient, diagnosed at age 50, taking 5mg  
4 prednisolone per day with Katz Index of 2, no previous hospitalisations for SLE and  
5  
6 three previous severe infections would be calculated as follows.  
7  
8

9  
10  
11  $(1 \times 1.12) + (0 \times 2.4) + (0 \times 1.33) + (0 \times 1.49) + (2 \times 1.06) + (0 \times 2.73) + (3 \times 2.40) = 10.44.$   
12  
13  
14  
15  
16

### 17 **Validation cohort**

18  
19  
20  
21  
22  
23 Validation was carried out in the lupus clinic at University College London Hospital  
24 (UCLH). All patients fulfilled the 1997 revised criteria of the American College of  
25 Rheumatology (ACR) for the classification of SLE<sup>22</sup>. The clinic has been running  
26 continuously since 1979 and has records from 699 patients. Medical records of all the  
27 patients were reviewed to identify those who had suffered severe infections. Severe  
28 infection was defined as that leading to hospitalization and/or death. Isolation of the  
29 causative agent was not required in every case, with final classification as an infection  
30 being made using standard clinical criteria as in the previous RELESSER study<sup>17</sup>. Only  
31 infections recorded during the follow-up period (i.e after the diagnosis of lupus) were  
32 included as outcomes.  
33  
34  
35  
36  
37  
38  
39  
40  
41  
42  
43  
44  
45  
46  
47  
48  
49

50 We used a nested case-control design. We identified 98 patients who had suffered at  
51 least one severe infection and compared their medical records with those of 111  
52 randomly selected patients with SLE who had never suffered from severe infections.  
53  
54  
55 By retrospective analysis of medical records, we obtained comprehensive information  
56  
57  
58  
59  
60 about demographic, clinical, serological and treatment factors in these two groups.

1  
2  
3  
4  
5  
6 We calculated the SLESIS for each of the 209 patients at the time of diagnosis. For  
7  
8 each of the 98 patients with infection we also calculated SLESIS for the clinical  
9  
10 assessment carried out at the last consultation prior to the infection. For comparison,  
11  
12 we calculated SLESIS in 98 controls matched for disease duration, as follows. For  
13  
14 each infection case we selected one control case from the 111 who had never suffered  
15  
16 severe infections. For the control we calculated the SLESIS at the time-point after  
17  
18 diagnosis corresponding to the duration after diagnosis when the matched case  
19  
20 suffered severe infection.  
21  
22  
23  
24  
25  
26  
27

### 28 ***Statistical analysis***

29  
30  
31  
32  
33  
34  
35 Demographic and clinical characteristics were compared between patients who  
36  
37 developed severe infection and patients who did not, using a Pearson  $\chi^2$  for  
38  
39 categorical variables or a Student's t-test for normally distributed continuous variables  
40  
41 (data expressed as mean  $\pm$  standard deviation). For non-normally distributed  
42  
43 variables, either a Mann-Whitney U test or a logarithmic transformation was  
44  
45 performed, and data are expressed as median and interquartile range. Multivariable  
46  
47 logistic regression analysis was performed to establish which factors were  
48  
49 independently associated with severe infection.  
50  
51  
52  
53

54 We compared SLESIS scores between case and control groups using the Mann-  
55  
56 Whitney U test. Receiver Operator Characteristics (ROC) analysis was used to define  
57  
58 the area under the curve (AUC) for SLESIS at diagnosis and SLESIS just prior to  
59  
60

1  
2  
3 infection. We also identified several possible cut-off scores for SLEIS with different  
4  
5 combinations of specificity and sensitivity for severe infection.  
6  
7  
8  
9

10  
11 The STATA for Windows statistical software package (v.13.1) was used for all  
12  
13 statistical analysis. Significance was defined as  $p < 0.05$ .  
14  
15  
16  
17

### 18 19 20 ***Patients and/or public involvement*** 21

22  
23  
24  
25  
26 Patients and/or public were not involved in this study.  
27  
28  
29  
30  
31  
32  
33  
34  
35  
36  
37  
38  
39  
40  
41  
42  
43  
44  
45  
46  
47  
48  
49  
50  
51  
52  
53  
54  
55  
56  
57  
58  
59  
60

## **Results**

Table 2 shows a comparison of the 98 patients (14% of the total cohort of 699 patients) who developed severe infection and the control group of 111 patients who never suffered from severe infection. These two groups did not differ in age, sex or ethnicity.

Patients who developed severe infections after diagnosis of SLE were more likely to have suffered previous severe infections before diagnosis of SLE (Pearson  $\chi^2 = 11.69$ ,  $p=0.001$ ) or to have been hospitalized for SLE (Pearson  $\chi^2 = 11.89$ ,  $p=0.001$ ) compared to those patients who never had severe infections. In terms of SLE manifestations, skin and renal disease were more common in the infection group (Pearson  $\chi^2 = 6.25$ ,  $p=0.012$ ; Pearson  $\chi^2 = 9.5$ ,  $p=0.004$ ) whereas joint involvement was more frequent in the non-infection group (Pearson  $\chi^2 = 11.21$ ,  $p=0.001$ ).

Patients in the infection group were more likely to have been treated with high doses of corticosteroids or an immunosuppressant (IS). Whereas 55% of the infection group had ever been treated with corticosteroids at a dose  $\geq 10$ mg per day, this only happened in 22% of the non-infected group (Pearson  $\chi^2 = 10.54$ ,  $p = 0.009$ ). Significantly increased risk of infection was found for azathioprine (Pearson  $\chi^2 = 5.89$ ,  $P=0.015$ ) and cyclophosphamide (Pearson  $\chi^2 = 8.26$ ,  $p=0.004$ ) but not for mycophenolate or rituximab. Hydroxychloroquine had been taken by 77% of the non-infection group compared to 67% of the infection group with no significant difference between groups.



1  
2  
3  
4  
5  
6 Regarding laboratory data, only neutropenia, which was twice as common in the  
7 infection group (34% vs. 17%), was significantly different between both groups  
8  
9 (Pearson  $\chi^2 = 7.63$ ,  $p = 0.006$ ).  
10  
11  
12  
13  
14  
15  
16

17 After multivariable analysis adjusted for age, only previous infection (beta coefficient:  
18 2.20, 95% CI: 0.77-3.62;  $p = 0.003$ ), previous hospitalizations for SLE (beta coefficient:  
19 1.12, 95% CI: 0.19-2.07;  $p = 0.021$ ) and treatment with corticosteroids  $\geq 10$  mg/day,  
20  
21 (beta coefficient: 3.39, 95% CI: 2.33 – 4.44;  $p < 0.001$ ) remained statistically significant.  
22  
23  
24  
25  
26  
27  
28  
29

### 30 ***Type of infection***

31  
32  
33  
34  
35  
36 The most common type of severe infection was respiratory tract infection ( $n = 29$ ; 29.6%  
37 of all infections), followed by urinary tract infection ( $n = 22$ , 22.4%) and gastrointestinal  
38 infection ( $n = 22$ , 22.4%). Less frequent were soft tissue infection ( $n = 11$ , 11.2%) and  
39 nervous system infections ( $n = 4$ , 4.1%). Twelve (12.4%) of the patients developed  
40 documented bacteraemia on blood culture and 15 (15.3%) had multiple organ  
41 involvement.  
42  
43  
44  
45  
46  
47  
48  
49  
50  
51  
52  
53

### 54 ***Mortality***

1  
2  
3 About a quarter (26.5%) of the patients died during their admission for severe infection,  
4 though this does not imply that death was always due to infection as many patients  
5 had co-morbidities or active lupus as well. Having recorded this high proportion of  
6 deaths, we analyzed the differences between the group of 26 patients who died during  
7 their admission for infection and the 72 patients who survived. These results are  
8 summarized in Table 3.  
9  
10  
11  
12  
13  
14  
15  
16  
17  
18  
19  
20

21 Patients who did not die had more previous hospitalizations due to SLE, compared to  
22 those who died (Pearson  $\chi^2 = 33.71$ ,  $p < 0.001$ ). In contrast, those who died were more  
23 likely to have suffered from severe infections prior to the diagnosis of SLE (Pearson  
24  $\chi^2 = 8.66$ ,  $p = 0.003$ ).  
25  
26  
27  
28  
29  
30  
31  
32  
33

34 There were no statistically significant differences among the clinical manifestations of  
35 SLE between these two groups.  
36  
37  
38  
39  
40  
41  
42

43 Regarding treatment, there were statistically significant differences for steroids at any  
44 time (Pearson  $\chi^2 = 8.19$ ,  $p = 0.004$ ) and rituximab (Pearson  $\chi^2 = 9.34$ ,  $p = 0.002$ ).  
45 However, for both these variables, patients who survived were more likely to have  
46 taken these drugs than those who died. Importantly, we only considered use of drugs  
47 in the period between diagnosis and first infection so survival from first infection would  
48 not affect the proportion of patients recorded as taking any drug.  
49  
50  
51  
52  
53  
54  
55  
56  
57  
58  
59  
60

1  
2  
3 Multiple organ involvement by infection was more common in deceased patients than  
4  
5 in patients who survived (Pearson  $\chi^2 = 20.5$ ,  $p < 0.001$ ). Patients who died were more  
6  
7 likely to have had positive anti-dsDNA compared to those who survived.  
8  
9

10  
11  
12  
13  
14 After multivariable analysis adjusted for age, previous hospitalizations due to SLE,  
15  
16 previous infection and the presence of multiple organ involvement remained  
17  
18 statistically significant as factors differentiating patients who died from those who  
19  
20 survived (Beta coefficient: -6.15, 95% CI: -9.57- -2.73;  $p < 0.001$ ; beta coefficient: 3.55,  
21  
22 95% CI: 0.47-6.63;  $p = 0.024$  and Beta coefficient 3.51 95% CI: 0.9-6.12;  $p = 0.008$ ).  
23  
24  
25

### 26 27 28 29 ***Analysis of SLESIS values over time*** 30

31  
32  
33  
34  
35  
36 Median (IQR) SLESIS at diagnosis of SLE in patients with infection was 4.27 (3.18)  
37  
38 which was significantly higher than in the control (no infection) group (Median 2.55,  
39  
40 IQR 3.79 ( $z = -3.34$ ;  $p = 0.0008$ ). Median (IQR) SLESIS just before the infection in the  
41  
42 infection group was 6.64 (4.18) which was statistically higher than the median SLESIS  
43  
44 at diagnosis in those patients ( $z = -5.73$ ,  $p < 0.001$ ) and also higher than median  
45  
46 SLESIS in the duration-matched control group at a comparable time-point in their  
47  
48 disease course (median 3.32, IQR 3.16,  $z = -6.99$ ;  $p < 0.001$ ). There were no significant  
49  
50 differences between the first and second SLESIS values (i.e. diagnosis and  
51  
52 comparable time-point to infection) for the matched controls.  
53  
54  
55  
56  
57  
58  
59  
60

1  
2  
3 Figure 1 shows the ROC analysis for SLESIS at diagnosis. The area under the ROC  
4 curve (AUC) was 0.6332 (SD 0.04; 95% CI: 0.56-0.70). We defined three possible cut-  
5 offs to distinguish patients with and without severe infection. We selected the cut-offs  
6 which had classified correctly the maximum percentage of the sample taking into  
7 account sensitivity and specificity. A cut-off for SLESIS at diagnosis  $\geq 3.18$  identified  
8 patients who would develop severe infection with sensitivity 77% and specificity 51%.  
9 For SLESIS  $\geq 3.46$ , sensitivity was 66% and specificity 55%. For SLESIS  $\geq 4.24$ ,  
10 sensitivity was 64% and specificity 60%.  
11  
12  
13  
14  
15  
16  
17  
18  
19  
20  
21  
22  
23  
24  
25

26 Figure 2 shows the ROC curve for SLESIS just prior to the infection. The AUC was  
27 0.79 (SD 0.03 95% CI: 0.73-0.85), which was better than for SLESIS at diagnosis. We  
28 selected three cut-offs:  $\geq 3.67$  identified patients who would develop severe infection  
29 with sensitivity of 90% and specificity of 43%. Similar results were obtained using  
30  $\geq 3.79$  as a cut-off (sensitivity of 88%, specificity of 50%). For SLESIS  $\geq 4.24$ , sensitivity  
31 was 86% and specificity 60%.  
32  
33  
34  
35  
36  
37  
38  
39  
40  
41  
42  
43  
44  
45  
46  
47  
48  
49  
50  
51  
52  
53  
54  
55  
56  
57  
58  
59  
60

## **Discussion**

In patients with SLE it has been reported that the prevalence of life-threatening infections appears to be highest within the first five years after disease onset<sup>23</sup>. However, severe infection represents a threat throughout the course of the disease, especially when these patients become older and develop more co-morbidities related to age. Given the potential mortality in SLE patients due to such infections, it is pertinent to pursue new options that allow us to predict which groups of patients will

1  
2  
3 have higher risk of developing major infections. Our aim was to develop a risk score  
4 (SLESIS) to aid in this purpose. This study fulfils the important task of testing the  
5 properties of this SLESIS score in a cohort independent of the RELESSER<sup>19,20</sup>  
6 population in which it was developed. Our London cohort differs from the Spanish  
7 cohort in terms of ethnicity but SLESIS still exhibits a valid and statistically significant  
8 association with severe infection.  
9  
10  
11  
12  
13  
14  
15  
16  
17  
18  
19  
20

21 During the last few years, there have been several publications aiming to develop  
22 algorithms that could measure the risk of developing severe infections in patients with  
23 other autoimmune diseases. Crowson<sup>24</sup> *et al* developed a score in order to detect  
24 severe infection promptly in a cohort of 410 patients with RA. The score was designed  
25 and validated to predict the 1-year risk of severe infection whereas SLESIS was  
26 elaborated to predict the risk of severe infection ever. Zink<sup>18</sup> *et al* built a score based  
27 on the RABBIT (Rheumatoid Arthritis Observation of Biologic Therapy) cohort in order  
28 to predict serious infection in patients on biologic treatment, with promising results.  
29 However, the authors suggested that their risk score was valid only in Caucasian  
30 populations in Western Europe. Beca<sup>25</sup> *et al* designed a risk calculator algorithm to  
31 differentiate flares from infections in SLE patients with fever. The study encompassed  
32 130 patients with SLE who presented with fever over a period of 13 years. ROC curve  
33 analysis in both papers showed that both scores were able to predict infection with  
34 AUC between 0.8 and 0.9. Nonetheless, both studies validated the algorithms in  
35 similar cohorts in terms of ethnicity distribution compared to the original cohorts. In  
36 contrast, we selected a validation cohort of patients in a different country, with a  
37 different range of ethnicities. In the Spanish cohort, 93% of patients were Caucasian  
38  
39  
40  
41  
42  
43  
44  
45  
46  
47  
48  
49  
50  
51  
52  
53  
54  
55  
56  
57  
58  
59  
60

1  
2  
3 and fewer than 1% African/Caribbean. In London, 68% were Caucasian and 28%  
4  
5 African/Caribbean, an ethnic group recognised as suffering more severe SLE.  
6  
7  
8  
9  
10

11 Patients with previous severe infection were predisposed to develop major infection  
12 and were also more likely to die during admission for severe infection. Impaired  
13 immune system functions in a sub-group of patients with SLE may contribute to  
14 increase the infection risk in those patients. There are immunological and genetic  
15 disorders that predispose to the development of infections in patients with SLE.  
16 Furthermore, other clinical and treatment factors might play a crucial role in the  
17 predisposition of patients with SLE to develop infection. For instance, the infection  
18 group were more likely than the controls to have had previous hospitalisations for SLE.  
19 These findings are comparable to other previous reports<sup>2, 26 - 28</sup>. In contrast, in the  
20 study of Ruiz-Irastorza *et al*, lung disease was the only clinical manifestation that was  
21 considered a predictor of major infection after the multivariate analysis<sup>29</sup>.  
22  
23  
24  
25  
26  
27  
28  
29  
30  
31  
32  
33  
34  
35  
36  
37  
38  
39  
40

41 In carrying out this project, we noted the fact that a quarter of the patients recorded as  
42 suffering severe infections died during their admission for infection. To investigate this  
43 mortality further, we carried out univariable and multivariable analysis of factors that  
44 could potentially influence whether or not these patients died. Surprisingly, though  
45 previous hospitalization due to SLE was a factor independently associated with  
46 increased risk of severe infection it was also associated with increased chance of  
47 surviving that severe infection, even after multivariable analysis. There is no obvious  
48 explanation for this apparent paradox. Perhaps the threshold for starting antibiotics  
49 was lower in such patients. We considered the possibility that deaths from severe  
50  
51  
52  
53  
54  
55  
56  
57  
58  
59  
60

1  
2  
3 infection had all occurred many years ago, during a period when more patients were  
4 treated with high dose IS such as cyclophosphamide. However, this is not the case as  
5  
6  
7  
8 12 patients died between 2000 and 2012 while the other 14 died before the year 2000.  
9

10  
11  
12  
13  
14 SLESIS was significantly higher just before the severe infection in comparison to the  
15 value at the diagnosis of SLE. This reinforces the idea that repeated measurement of  
16  
17  
18 SLESIS may be a helpful clinical assessment tool. As lupus activity and treatment  
19  
20  
21 change over time, it is predictable that SLESIS would change over time, but it was  
22  
23  
24 important to investigate whether this makes SLESIS at diagnosis a poorer predictor of  
25  
26  
27 infection. Development of chronic damage over time, as well as cumulative use of  
28  
29  
30 corticosteroids and immunosuppressive drugs could contribute to these changes in  
31  
32  
33 SLESIS related to increased infection risk. Some variables of SLESIS, will never  
34  
35  
36 change over time, such as age at diagnosis, ethnicity and gender, whereas others,  
37  
38  
39 such as number of previous severe infections, Katz index and current dose of  
40  
41  
42 corticosteroids could change and may thus contribute to changes in SLESIS. One  
43  
44  
45 strategy could be to re-calculate SLESIS annually and after every severe infection  
46  
47  
48 and hospitalisation. In this way, a prospective study could be carried out to calculate  
49  
50  
51 SLESIS multiple times during follow-up in order to assess its variation over time and  
52  
53  
54 see if its peak (vs. lower values during follow-up) is really associated with a higher  
55  
56  
57 probability of severe infection.  
58  
59

60  
61  
62  
63  
64  
65  
66  
67  
68  
69  
70  
71  
72  
73  
74  
75  
76  
77  
78  
79  
80  
81  
82  
83  
84  
85  
86  
87  
88  
89  
90  
91  
92  
93  
94  
95  
96  
97  
98  
99  
100  
101  
102  
103  
104  
105  
106  
107  
108  
109  
110  
111  
112  
113  
114  
115  
116  
117  
118  
119  
120  
121  
122  
123  
124  
125  
126  
127  
128  
129  
130  
131  
132  
133  
134  
135  
136  
137  
138  
139  
140  
141  
142  
143  
144  
145  
146  
147  
148  
149  
150  
151  
152  
153  
154  
155  
156  
157  
158  
159  
160  
161  
162  
163  
164  
165  
166  
167  
168  
169  
170  
171  
172  
173  
174  
175  
176  
177  
178  
179  
180  
181  
182  
183  
184  
185  
186  
187  
188  
189  
190  
191  
192  
193  
194  
195  
196  
197  
198  
199  
200  
201  
202  
203  
204  
205  
206  
207  
208  
209  
210  
211  
212  
213  
214  
215  
216  
217  
218  
219  
220  
221  
222  
223  
224  
225  
226  
227  
228  
229  
230  
231  
232  
233  
234  
235  
236  
237  
238  
239  
240  
241  
242  
243  
244  
245  
246  
247  
248  
249  
250  
251  
252  
253  
254  
255  
256  
257  
258  
259  
260  
261  
262  
263  
264  
265  
266  
267  
268  
269  
270  
271  
272  
273  
274  
275  
276  
277  
278  
279  
280  
281  
282  
283  
284  
285  
286  
287  
288  
289  
290  
291  
292  
293  
294  
295  
296  
297  
298  
299  
300  
301  
302  
303  
304  
305  
306  
307  
308  
309  
310  
311  
312  
313  
314  
315  
316  
317  
318  
319  
320  
321  
322  
323  
324  
325  
326  
327  
328  
329  
330  
331  
332  
333  
334  
335  
336  
337  
338  
339  
340  
341  
342  
343  
344  
345  
346  
347  
348  
349  
350  
351  
352  
353  
354  
355  
356  
357  
358  
359  
360  
361  
362  
363  
364  
365  
366  
367  
368  
369  
370  
371  
372  
373  
374  
375  
376  
377  
378  
379  
380  
381  
382  
383  
384  
385  
386  
387  
388  
389  
390  
391  
392  
393  
394  
395  
396  
397  
398  
399  
400  
401  
402  
403  
404  
405  
406  
407  
408  
409  
410  
411  
412  
413  
414  
415  
416  
417  
418  
419  
420  
421  
422  
423  
424  
425  
426  
427  
428  
429  
430  
431  
432  
433  
434  
435  
436  
437  
438  
439  
440  
441  
442  
443  
444  
445  
446  
447  
448  
449  
450  
451  
452  
453  
454  
455  
456  
457  
458  
459  
460  
461  
462  
463  
464  
465  
466  
467  
468  
469  
470  
471  
472  
473  
474  
475  
476  
477  
478  
479  
480  
481  
482  
483  
484  
485  
486  
487  
488  
489  
490  
491  
492  
493  
494  
495  
496  
497  
498  
499  
500  
501  
502  
503  
504  
505  
506  
507  
508  
509  
510  
511  
512  
513  
514  
515  
516  
517  
518  
519  
520  
521  
522  
523  
524  
525  
526  
527  
528  
529  
530  
531  
532  
533  
534  
535  
536  
537  
538  
539  
540  
541  
542  
543  
544  
545  
546  
547  
548  
549  
550  
551  
552  
553  
554  
555  
556  
557  
558  
559  
560  
561  
562  
563  
564  
565  
566  
567  
568  
569  
570  
571  
572  
573  
574  
575  
576  
577  
578  
579  
580  
581  
582  
583  
584  
585  
586  
587  
588  
589  
590  
591  
592  
593  
594  
595  
596  
597  
598  
599  
600  
601  
602  
603  
604  
605  
606  
607  
608  
609  
610  
611  
612  
613  
614  
615  
616  
617  
618  
619  
620  
621  
622  
623  
624  
625  
626  
627  
628  
629  
630  
631  
632  
633  
634  
635  
636  
637  
638  
639  
640  
641  
642  
643  
644  
645  
646  
647  
648  
649  
650  
651  
652  
653  
654  
655  
656  
657  
658  
659  
660  
661  
662  
663  
664  
665  
666  
667  
668  
669  
670  
671  
672  
673  
674  
675  
676  
677  
678  
679  
680  
681  
682  
683  
684  
685  
686  
687  
688  
689  
690  
691  
692  
693  
694  
695  
696  
697  
698  
699  
700  
701  
702  
703  
704  
705  
706  
707  
708  
709  
710  
711  
712  
713  
714  
715  
716  
717  
718  
719  
720  
721  
722  
723  
724  
725  
726  
727  
728  
729  
730  
731  
732  
733  
734  
735  
736  
737  
738  
739  
740  
741  
742  
743  
744  
745  
746  
747  
748  
749  
750  
751  
752  
753  
754  
755  
756  
757  
758  
759  
760  
761  
762  
763  
764  
765  
766  
767  
768  
769  
770  
771  
772  
773  
774  
775  
776  
777  
778  
779  
780  
781  
782  
783  
784  
785  
786  
787  
788  
789  
790  
791  
792  
793  
794  
795  
796  
797  
798  
799  
800  
801  
802  
803  
804  
805  
806  
807  
808  
809  
810  
811  
812  
813  
814  
815  
816  
817  
818  
819  
820  
821  
822  
823  
824  
825  
826  
827  
828  
829  
830  
831  
832  
833  
834  
835  
836  
837  
838  
839  
840  
841  
842  
843  
844  
845  
846  
847  
848  
849  
850  
851  
852  
853  
854  
855  
856  
857  
858  
859  
860  
861  
862  
863  
864  
865  
866  
867  
868  
869  
870  
871  
872  
873  
874  
875  
876  
877  
878  
879  
880  
881  
882  
883  
884  
885  
886  
887  
888  
889  
890  
891  
892  
893  
894  
895  
896  
897  
898  
899  
900  
901  
902  
903  
904  
905  
906  
907  
908  
909  
910  
911  
912  
913  
914  
915  
916  
917  
918  
919  
920  
921  
922  
923  
924  
925  
926  
927  
928  
929  
930  
931  
932  
933  
934  
935  
936  
937  
938  
939  
940  
941  
942  
943  
944  
945  
946  
947  
948  
949  
950  
951  
952  
953  
954  
955  
956  
957  
958  
959  
960  
961  
962  
963  
964  
965  
966  
967  
968  
969  
970  
971  
972  
973  
974  
975  
976  
977  
978  
979  
980  
981  
982  
983  
984  
985  
986  
987  
988  
989  
990  
991  
992  
993  
994  
995  
996  
997  
998  
999  
1000

1  
2  
3 risk of infections although results have been controversial among the different  
4 cohorts<sup>31</sup>. In our study, cyclophosphamide and azathioprine were associated with  
5 increased risk of severe infection in the univariate analysis but that significance was  
6 lost after the multivariable analysis.  
7  
8  
9  
10  
11  
12  
13  
14  
15

16 There was a trend with hydroxychloroquine (HCQ) which seemed to be the opposite  
17 direction to corticosteroids or immunosuppressants, since fewer patients in the study  
18 group than the control group had ever been treated with HCQ. This finding is in  
19 agreement with previous reports<sup>29 32</sup> although in our study, it did not reach statistical  
20 significance. Ruiz-Irastorza<sup>29</sup> *et al.* found that patients taking antimalarials were 16  
21 times less likely to suffer a major infection. Similarly, Sisó<sup>32</sup> *et al.*, found a lower  
22 frequency of infections among those previously treated with antimalarials in a  
23 retrospective study. Bultink *et al.*, in a study designed to analyse the effect of the  
24 deficiency of functional mannose-binding lectin, also found that treatment with HCQ  
25 was associated with fewer severe infections although the authors attributed this  
26 association to the presumed lesser severity of lupus patients who take HCQ<sup>33</sup>.  
27  
28  
29  
30  
31  
32  
33  
34  
35  
36  
37  
38  
39  
40  
41  
42  
43  
44  
45

46 Overall, the AUC in our study were not as high as for previous scores developed for  
47 RA<sup>18 24</sup>. However, this is the first score that has been developed to predict severe  
48 infections in SLE and may represent a first step in developing tools to do this  
49 accurately. We acknowledge several limitations in our study. Firstly, the retrospective  
50 design of the study. Secondly, the ethnicity item in SLESIS distinguishes only Latin  
51 American ethnicity as a separate group, which was not helpful in the London  
52 population. A modified SLESIS including HR for other ethnic groups would be more  
53  
54  
55  
56  
57  
58  
59  
60



1  
2  
3 widely applicable globally but could not have been derived from the RELESSER cohort  
4  
5 (too ethnically homogeneous) or the UCL cohort (too small). Thirdly, the Katz index  
6  
7 used by RELESSER is a simple and helpful measure of disease severity (not just  
8  
9 activity) but is not widely used in clinical practice. However, in the original RELESSER  
10  
11 study<sup>17</sup>, from which SLESIS was derived, SLICC/ACR/Damage Index (SDI), Katz  
12  
13 Index and SELENA-SLEDAI activity score were all measured and the Katz Index was  
14  
15 the only one statistically associated with severe infection. Notwithstanding these  
16  
17 limitations, we have shown that SLESIS at diagnosis was significantly higher in the  
18  
19 group of patients who later suffered severe infections than in the control group of SLE  
20  
21 patients who did not suffer severe infection.  
22  
23  
24  
25  
26  
27  
28  
29

30 How might SLESIS be used in clinical practice? It is important to bear in mind that both  
31  
32 sensitivity and specificity for severe infection were modest for SLESIS at diagnosis.  
33  
34 For SLESIS just before the infection, sensitivity was high (90%) but specificity was low  
35  
36 (54%). The low specificity means that SLESIS could not be used to decide upon use  
37  
38 of management measures with a high risk of adverse effects. We would suggest that  
39  
40 patients with high SLESIS (>3.5) at any point could be followed-up with a higher index  
41  
42 of suspicion for infection and lower threshold for using antibiotics. Although this may  
43  
44 be an obvious extrapolation of the data, it is not possible to conclude that the early use  
45  
46 of antibiotics in patients with high SLESIS will impact on the outcomes, and therefore,  
47  
48 this strategy cannot be suggested based solely on the results of our work. SLESIS at  
49  
50 diagnosis, together with other factors, might also help in deciding which patients might  
51  
52 benefit from vaccination against bacterial infections (e.g. pneumococcus) and  
53  
54 considering benefit-risk balance of corticosteroids ( $\geq 10$ mg/day) and other  
55  
56 immunosuppressants.  
57  
58  
59  
60

1  
2  
3  
4  
5  
6 In summary, despite the limitations, our study has demonstrated strong arguments to  
7  
8 perform future prospective studies to assess if SLESIS, or an improved form of  
9  
10 SLESIS, could be clinically useful in the early diagnosis and prevention of severe  
11  
12 infections in patients with SLE.  
13  
14  
15  
16  
17  
18  
19  
20  
21  
22  
23  
24  
25  
26  
27  
28  
29  
30  
31  
32  
33  
34  
35  
36  
37  
38  
39  
40  
41  
42  
43  
44  
45  
46  
47  
48  
49  
50  
51  
52  
53  
54  
55  
56  
57  
58  
59  
60

For peer review only

## ACKNOWLEDGEMENTS

The authors would like to acknowledge the researchers of the RELESSER group and Research Unit of Spanish Society of Rheumatology, who carried out the original study from which SLESIS was derived (Ref 17). BTS, CW, DI and AR work in a department supported by the National Institute for Health Research University College London Hospitals Biomedical Research Centre.

## DATA AVAILABILITY STATEMENT

No additional data available.

## CONTRIBUTORSHIP STATEMENT

AR and BTS designed the study. IRF, JMPR and VCP developed the SLESIS score and advised on design of the study. BTS, AR, CW and DI collected the data. BTS and VCP carried out the statistical analysis. BTS, JMPR, IRF, VCP, DI and AR all took part in interpreting the results and writing the final manuscript.

## CONFLICT OF INTEREST STATEMENT

None of the authors have any conflicts of interest to disclose.

## FUNDING

1  
2  
3 This work was supported by the National Institute for Health Research University  
4 College London Hospitals Biomedical Research Centre and the Spanish Foundation  
5  
6 of Rheumatology (FER).  
7  
8  
9  
10  
11  
12  
13  
14  
15  
16  
17  
18  
19  
20  
21  
22  
23  
24  
25  
26  
27  
28  
29  
30  
31  
32  
33  
34  
35  
36  
37  
38  
39  
40  
41  
42  
43  
44  
45  
46  
47  
48  
49  
50  
51  
52  
53  
54  
55  
56  
57  
58  
59  
60

For peer review only

## References

1. Iliopoulos AG, Tsokos GC. Immunopathogenesis and spectrum of infections in systemic lupus erythematosus. *Semin Arthritis Rheum* 1996;25(5):318-36.
2. Goldblatt F, Chambers S, Rahman A, et al. Serious infections in British patients with systemic lupus erythematosus: hospitalisations and mortality. *Lupus* 2009;18(8):682-9.
3. Cervera R, Khamashta MA, Font J, et al. Morbidity and mortality in systemic lupus erythematosus during a 5-year period. A multicenter prospective study of 1,000 patients. European Working Party on Systemic Lupus Erythematosus. *Medicine (Baltimore)* 1999;78(3):167-75.
4. Jacobsen S, Petersen J, Ullman S, et al. A multicentre study of 513 Danish patients with systemic lupus erythematosus. II. Disease mortality and clinical factors of prognostic value. *Clin Rheumatol* 1998;17(6):478-84.
5. Hernandez-Cruz B, Tapia N, Villa-Romero AR, et al. Risk factors associated with mortality in systemic lupus erythematosus. A case-control study in a tertiary care center in Mexico City. *Clin Exp Rheumatol* 2001;19(4):395-401.
6. Kang I, Park SH. Infectious complications in SLE after immunosuppressive therapies. *Curr Opin Rheumatol* 2003;15(5):528-34.
7. Molina H. Update on complement in the pathogenesis of systemic lupus erythematosus. *Curr Opin Rheumatol* 2002;14(5):492-7.
8. Garred P, Voss A, Madsen HO, et al. Association of mannose-binding lectin gene variation with disease severity and infections in a population-based cohort of systemic lupus erythematosus patients. *Genes Immun* 2001;2(8):442-50.
9. Cuchacovich R, Gedalia A. Pathophysiology and clinical spectrum of infections in systemic lupus erythematosus. *Rheum Dis Clin North Am* 2009;35(1):75-93.
10. Ucar Angulo E, Rivera Garcia N. [Comorbidity of systemic lupus erythematosus]. *Reumatologia clinica* 2008;4 Suppl 1:17-21.
11. Zandman-Goddard G, Shoenfeld Y. Infections and SLE. *Autoimmunity* 2005;38(7):473-85.
12. Fessler BJ. Infectious diseases in systemic lupus erythematosus: risk factors, management and prophylaxis. *Best Pract Res Clin Rheumatol* 2002;16(2):281-91.
13. Danza A, Ruiz-Irastorza G. Infection risk in systemic lupus erythematosus patients: susceptibility factors and preventive strategies. *Lupus* 2013;22(12):1286-94.
14. Falagas ME, Manta KG, Betsi GI, et al. Infection-related morbidity and mortality in patients with connective tissue diseases: a systematic review. *Clin Rheumatol* 2007;26(5):663-70.
15. Edwards CJ, Lian TY, Badsha H, et al. Hospitalization of individuals with systemic lupus erythematosus: characteristics and predictors of outcome. *Lupus* 2003;12(9):672-6.
16. Ward MM. Avoidable hospitalizations in patients with systemic lupus erythematosus. *Arthritis Rheum* 2008;59(2):162-8.
17. Rua-Figueroa I, Lopez-Longo J, Galindo-Izquierdo M, et al. Incidence, associated factors and clinical impact of severe infections in a large, multicentric cohort of patients with systemic lupus erythematosus. *Semin Arthritis Rheum* 2017;47(1):38-45.
18. Zink A, Manger B, Kaufmann J, Eisterhues C, et al. Evaluation of the RABBIT Risk Score for serious infections. *Ann Rheum Dis* 2014;73(9):1673-6.
19. Rua-Figueroa I, Lopez-Longo FJ, Calvo-Alen J, et al. National registry of patients with systemic lupus erythematosus of the Spanish Society of Rheumatology: objectives and methodology. *Reumatologia clinica* 2014;10(1):17-24.
20. Pego-Reigosa JM, Rua-Figueroa I, Lopez-Longo FJ, et al. Analysis of disease activity and response to treatment in a large Spanish cohort of patients with systemic lupus erythematosus. *Lupus* 2015;24(7):720-9.
21. Katz JD, Senecal JL, Rivest C, et al. A simple severity of disease index for systemic lupus erythematosus. *Lupus* 1993;2(2):119-23.

- 1
- 2
- 3
- 4 22. Hochberg MC. Updating the American College of Rheumatology revised criteria for the
- 5 classification of systemic lupus erythematosus. *Arthritis Rheum* 1997;40(9):1725.
- 6
- 7 23. Cervera R, Khamashta MA, Font J, et al. Morbidity and mortality in systemic lupus erythematosus
- 8 during a 10-year period: a comparison of early and late manifestations in a cohort of 1,000
- 9 patients. *Medicine (Baltimore)* 2003;82(5):299-308.
- 10
- 11 24. Crowson CS, Hoganson DD, Fitz-Gibbon PD, et al. Development and validation of a risk score for
- 12 serious infection in patients with rheumatoid arthritis. *Arthritis Rheum* 2012;64(9):2847-55.
- 13
- 14 25. Beca S, Rodriguez-Pinto I, Alba MA, et al. Development and validation of a risk calculator to
- 15 differentiate flares from infections in systemic lupus erythematosus patients with fever.
- 16 *Autoimmun Rev* 2015;14(7):586-93.
- 17
- 18 26. Goldblatt F, Yuste J, Isenberg DA, et al. Impaired C3b/iC3b deposition on Streptococcus
- 19 pneumoniae in serum from patients with systemic lupus erythematosus. *Rheumatology*
- 20 *(Oxford)* 2009;48(12):1498-501.
- 21
- 22 27. Duffy KN, Duffy CM, Gladman DD. Infection and disease activity in systemic lupus erythematosus:
- 23 a review of hospitalized patients. *J Rheumatol* 1991;18(8):1180-4.
- 24
- 25 28. Noel V, Lortholary O, Casassus P, et al. Risk factors and prognostic influence of infection in a single
- 26 cohort of 87 adults with systemic lupus erythematosus. *Ann Rheum Dis* 2001;60(12):1141-4.
- 27
- 28 29. Ruiz-Irastorza G, Olivares N, Ruiz-Arruza I, et al. Predictors of major infections in systemic lupus
- 29 erythematosus. *Arthritis Res Ther* 2009;11(4):R109.
- 30
- 31 30. Pryor BD, Bologna SG, Kahl LE. Risk factors for serious infection during treatment with
- 32 cyclophosphamide and high-dose corticosteroids for systemic lupus erythematosus. *Arthritis*
- 33 *Rheum* 1996;39(9):1475-82.
- 34
- 35 31. Gladman DD, Hussain F, Ibanez D, et al. The nature and outcome of infection in systemic lupus
- 36 erythematosus. *Lupus* 2002;11(4):234-9.
- 37
- 38 32. Siso A, Ramos-Casals M, Bove A, et al. Previous antimalarial therapy in patients diagnosed with
- 39 lupus nephritis: influence on outcomes and survival. *Lupus* 2008;17(4):281-8.
- 40
- 41 33. Bultink IE, Hamann D, Seelen MA, et al. Deficiency of functional mannose-binding lectin is not
- 42 associated with infections in patients with systemic lupus erythematosus. *Arthritis Res Ther*
- 43 2006;8(6):R183.
- 44
- 45
- 46
- 47
- 48
- 49
- 50
- 51
- 52
- 53
- 54
- 55
- 56
- 57
- 58
- 59
- 60

**Table 1 Variables incorporated into SLEIS**

| Variable                                                            | Beta Coefficient | Hazard ratio (HR) for severe infection | 95% confidence interval |
|---------------------------------------------------------------------|------------------|----------------------------------------|-------------------------|
| <b>Age at diagnosis (&gt;46 years old)</b>                          | 0.1163           | 1.12                                   | 1.07 – 1.18             |
| <b>Latin American ethnicity</b>                                     | 0.427            | 2.40                                   | 2.29 – 2.5              |
| <b>Current dose of corticosteroids <math>\geq 10</math> mg/day)</b> | 0.2878           | 1.33                                   | 1.15 – 1.55             |
| <b>Sex=male</b>                                                     | 0.3692           | 1.49                                   | 1.22 – 1.81             |
| <b>Previous hospitalization for SLE</b>                             | 1.0049           | 2.73                                   | 2.22 – 3.35             |
| <b>Katz Index<sup>21</sup></b>                                      | 0.062            | 1.06                                   | 1.03 – 1.1              |
| <b>Each previous severe infection</b>                               | 0.8739           | 2.40                                   | 2.29 – 2.50             |

**Footnote**

These HR values were derived from the retrospective analysis of 3,658 Spanish patients described in reference 17.

**Table 2. Descriptive data: SLE patients with infection vs without infection**

|                                                       | Study (infection) group (n=98) | Control (non infection) group (n=111) | P value      |
|-------------------------------------------------------|--------------------------------|---------------------------------------|--------------|
| <b>Gender, n (%)</b>                                  |                                |                                       |              |
| - Females                                             | 90 (92)                        | 103 (93)                              | ns           |
| - Males                                               | 8 (8)                          | 8 (7)                                 |              |
| <b>Median age at diagnosis of SLE (IQR), years</b>    | 30.5 (27)                      | 31 (18)                               | ns           |
| <b>Median age at time of infection (IQR), years</b>   | 43 (25)                        | Not applicable                        |              |
| <b>Ethnicity, n (%)</b>                               |                                |                                       |              |
| - Caucasian                                           | 48 (49)                        | 72 (65)                               | ns           |
| - Hispanics                                           | 3 (3)                          | 2 (2)                                 |              |
| - Afro-Caribbean                                      | 28 (29)                        | 20 (18)                               |              |
| - Asian                                               | 7 (7)                          | 6 (5)                                 |              |
| - Other                                               | 12 (12)                        | 12 (11)                               |              |
| <b>Median length of follow-up (IQR), years</b>        | 9.5 (14)                       | 14 (9)                                | ns           |
| <b>Previous infection before SLE diagnosis, n (%)</b> | 16 (16)                        | 3 (2)                                 | <b>0.001</b> |



|                                 |                                                   |         |          |                  |
|---------------------------------|---------------------------------------------------|---------|----------|------------------|
| 1<br>2<br>3<br>4<br>5<br>6<br>7 | <b>Previous hospitalizations due to SLE n (%)</b> | 55 (56) | 36 (32)  | <b>0.001</b>     |
| 8<br>9<br>10<br>11<br>12        | <b>SLE main features (cumulative) n, (%)</b>      |         |          |                  |
| 13                              | - Skin disease                                    | 76 (78) | 67 (60)  | <b>0.012</b>     |
| 14                              | - Joint disease                                   | 72 (74) | 101 (91) | <b>0.001</b>     |
| 15                              | - Renal disease                                   | 42 (43) | 24 (22)  | <b>0.004</b>     |
| 16                              | - Neuropsychiatric                                | 13 (13) | 12 (11)  | ns               |
| 17                              | disease                                           |         |          |                  |
| 18                              | - Serositis                                       | 19 (19) | 33 (30)  | ns               |
| 19                              |                                                   |         |          |                  |
| 20                              | <b>Previous drug treatment n (%)</b>              |         |          |                  |
| 21                              | Corticosteroids                                   | 89 (91) | 43 (39)  | <b>&lt;0.001</b> |
| 22                              | Corticosteroids (≥10mg per                        | 54 (55) | 25 (23)  | <b>0.009</b>     |
| 23                              | day at any time)                                  |         |          |                  |
| 24                              | No Hydroxychloroquine                             | 32 (33) | 25 (23)  | ns               |
| 25                              | Azathioprine                                      | 47 (48) | 35 (32)  | <b>0.015</b>     |
| 26                              | Mycophenolate                                     | 36 (35) | 28 (25)  | ns               |
| 27                              | Cyclophosphamide                                  | 28 (29) | 13 (13)  | <b>0.004</b>     |
| 28                              | Rituximab                                         | 26 (27) | 25 (23)  | ns               |
| 29                              |                                                   |         |          |                  |
| 30                              | <b>Laboratory data, n(%) at</b>                   |         |          |                  |
| 31                              | <b>any time</b>                                   |         |          |                  |
| 32                              |                                                   |         |          |                  |
| 33                              |                                                   |         |          |                  |
| 34                              |                                                   |         |          |                  |
| 35                              |                                                   |         |          |                  |
| 36                              |                                                   |         |          |                  |
| 37                              |                                                   |         |          |                  |
| 38                              |                                                   |         |          |                  |
| 39                              |                                                   |         |          |                  |
| 40                              |                                                   |         |          |                  |
| 41                              |                                                   |         |          |                  |
| 42                              |                                                   |         |          |                  |
| 43                              |                                                   |         |          |                  |
| 44                              |                                                   |         |          |                  |
| 45                              |                                                   |         |          |                  |
| 46                              |                                                   |         |          |                  |
| 47                              |                                                   |         |          |                  |
| 48                              |                                                   |         |          |                  |
| 49                              |                                                   |         |          |                  |
| 50                              |                                                   |         |          |                  |
| 51                              |                                                   |         |          |                  |
| 52                              |                                                   |         |          |                  |
| 53                              |                                                   |         |          |                  |
| 54                              |                                                   |         |          |                  |
| 55                              |                                                   |         |          |                  |
| 56                              |                                                   |         |          |                  |
| 57                              |                                                   |         |          |                  |
| 58                              |                                                   |         |          |                  |
| 59                              |                                                   |         |          |                  |
| 60                              |                                                   |         |          |                  |

|                                 |         |         |              |
|---------------------------------|---------|---------|--------------|
| - Neutropenia                   | 33 (34) | 19 (17) | <b>0.006</b> |
| - Lymphopenia                   | 76 (78) | 73(66)  | ns           |
| - Anti-dsDNA +                  | 67 (68) | 66 (60) | ns           |
| - Low C3                        | 57 (58) | 50 (45) | ns           |
| <b>Outcomes</b>                 |         |         |              |
| - Deaths                        | 26 (27) | 2 (2)   | <b>0.03</b>  |
| - Patients with >1<br>infection | 18 (18) | 0       |              |

**Table 3- Comparison of patients who died during admission for severe infection and those who survived**

|                                                                | <b>Deceased Patients<br/>n=26 (26.5%)</b> | <b>Alive patients<br/>n=72 (73.5%)</b> | <b>P value</b>   |
|----------------------------------------------------------------|-------------------------------------------|----------------------------------------|------------------|
| <b>Mean age at diagnosis (SD)</b>                              | 33.8 (14.1)                               | 31.2 (15.1)                            | ns               |
| <b>Mean age at infection (SD)</b>                              | 42.88 (16.7)                              | 40.88 (16.7)                           | ns               |
| <b>Follow-up between diagnosis and first infection (years)</b> | 9.11 (7.04)                               | 10.8 (10.3)                            | ns               |
| <b>Ethnicity n, (%)</b>                                        |                                           |                                        |                  |
| - Caucasian                                                    | 16 (61.5)                                 | 31(43.1)                               |                  |
| - Hispanics                                                    | NA                                        | 3 (4.2)                                |                  |
| - Afro-Caribbean                                               | 8 (30.8)                                  | 20 (27.8)                              | ns               |
| - Asian                                                        | 2 (7.7)                                   | 4 (5.6)                                |                  |
| - Others                                                       | NA                                        | 12 (16.7)                              |                  |
| <b>Gender (female), n (%)</b>                                  | 25 (96)                                   | 65 (90)                                | ns               |
| <b>Previous hospitalizations, n (%)</b>                        | 2 (8)                                     | 53 (74)                                | <b>&lt;0.001</b> |

|                                                          |         |         |              |
|----------------------------------------------------------|---------|---------|--------------|
| Previous severe infection before diagnosis of SLE, n (%) | 9(35)   | 7(10)   | <b>0.003</b> |
| Skin disease, n (%)                                      | 18 (69) | 58 (81) | ns           |
| Renal disease, n (%)                                     | 10 (39) | 32 (44) | ns           |
| Joint disease, n (%)                                     | 22 (85) | 50 (69) | ns           |
| Neuropsychiatric disease, n (%)                          | 4 (15)  | 9 (13)  | ns           |
| Serositis, n (%)                                         | 7 (27)  | 12 (17) | ns           |
| Corticosteroids per day at any time), n (%)              | 20 (77) | 69 (96) | <b>0.02</b>  |
| Corticosteroids $\geq$ 10 mg/day at any time, n (%)      | 17 (65) | 37 (51) | ns           |
| Hydroxychloroquine, n (%)                                | 20 (77) | 46 (64) | ns           |
| Rituximab , n (%)                                        | 1 (4)   | 25 (35) | <b>0.002</b> |
| Cyclophosphamide, n (%)                                  | 11 (42) | 17 (24) | ns           |
| Azathioprine, n (%)                                      | 14 (54) | 33 (46) | ns           |
| Mycophenolate, n (%)                                     | 10 (39) | 26 (36) | ns           |
| Splenectomy, n (%)                                       | 0       | 3 (4)   | ns           |
| Bacteraemia, n (%)                                       | 4 (15)  | 9 (13)  | ns           |

|                                          |         |         |                  |
|------------------------------------------|---------|---------|------------------|
| <b>Multiple organ involvement, n (%)</b> | 12 (46) | 5 (7)   | <b>&lt;0.001</b> |
| <b>Low complement, n (%)</b>             | 11 (42) | 46 (64) | ns               |
| <b>Neutropenia, n (%)</b>                | 5 (19)  | 28 (39) | ns               |
| <b>Lymphopenia, n (%)</b>                | 20 (77) | 56 (78) | ns               |
| <b>a-dsDNA, n (%)</b>                    | 20 (77) | 47 (65) | ns               |

**Figure legends:**

Figure 1. ROC Curve analysis-SLESIS at diagnosis

Figure 2. ROC Curve Analysis- SLESIS before infection

1  
2  
3  
4  
5  
6  
7  
8  
9  
10  
11  
12  
13  
14  
15  
16  
17  
18  
19  
20  
21  
22  
23  
24  
25  
26  
27  
28  
29  
30  
31  
32  
33  
34  
35  
36  
37  
38  
39  
40  
41  
42  
43  
44  
45  
46  
47  
48  
49  
50  
51  
52  
53  
54  
55  
56  
57  
58  
59  
60

For peer review only

1  
2  
3  
4  
5  
6  
7  
8  
9  
10  
11  
12  
13  
14  
15  
16  
17  
18  
19  
20  
21  
22  
23  
24  
25  
26  
27  
28  
29  
30  
31  
32  
33  
34  
35  
36  
37  
38  
39  
40  
41  
42  
43  
44  
45  
46  
47  
48  
49  
50  
51  
52  
53  
54  
55  
56  
57  
58  
59  
60

**Figure 1. ROC Curve analysis-SLESIS at diagnosis**

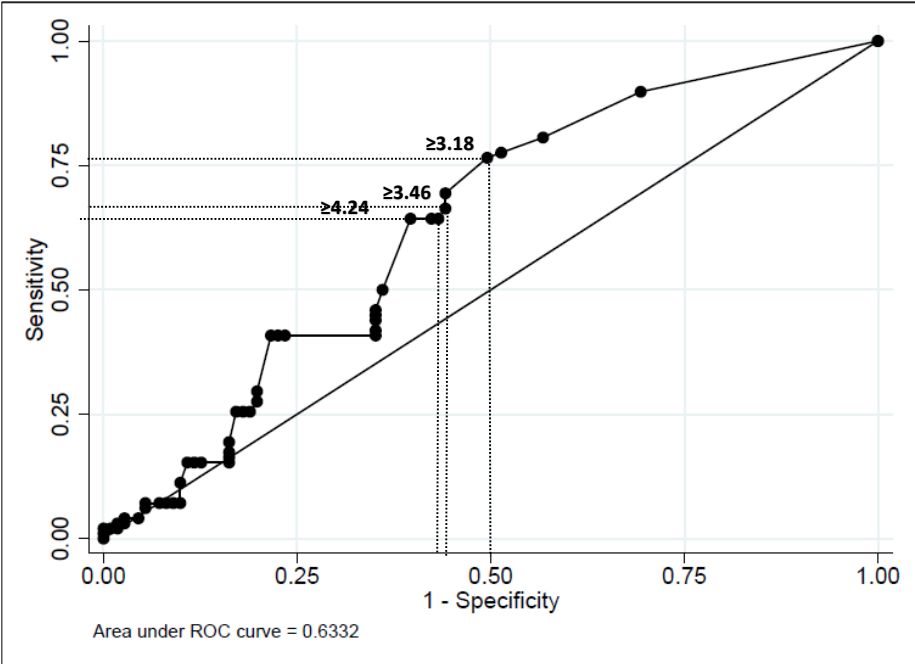

**Figure 2- ROC Curve Analysis- SLEIS before infection**

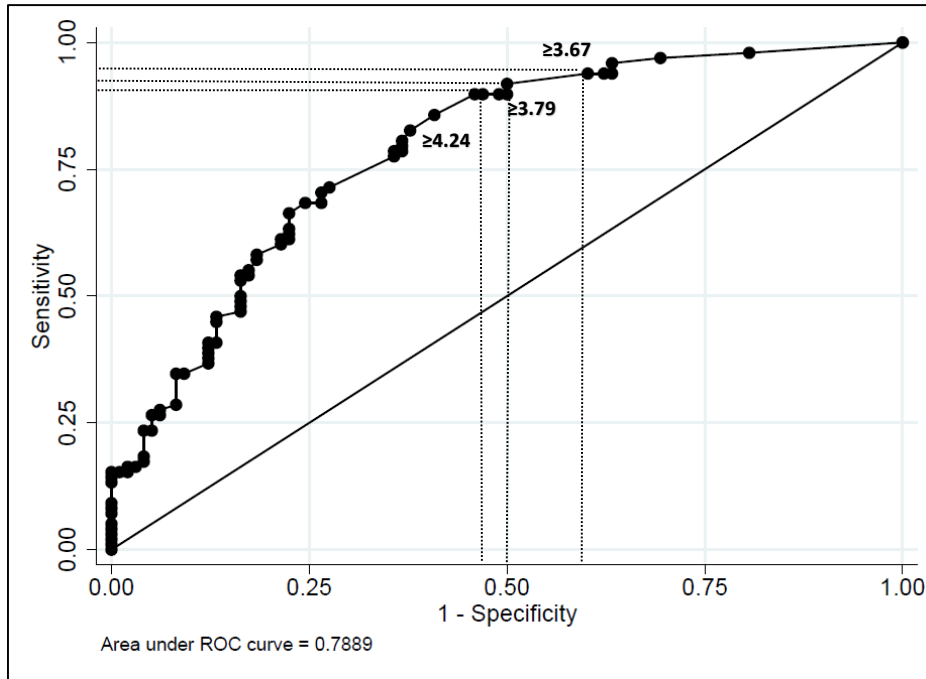

view only
